# Supplementary material for: Yeast Gup1(2) Proteins Are Homologues of the Hedgehog Morphogens Acyltransferases HHAT(L): Facts and Implications
Source: J Dev Biol. 2016 Nov 5;4(4):33. doi: 10.3390/jdb4040033 (PMC5831804; doi:10.3390/jdb4040033)
Supplement: Supplementary file 1 [file jdb-04-00033-s001.zip]

Archive with 5 entries (5 files):
- Figure S1 Legend.pdf
- Figure S1A.pdf
- Figure S1B.PDF
- File S1.xls
- File S2.xls
