# Supplementary material for: Yeast Gup1(2) Proteins Are Homologues of the Hedgehog Morphogens Acyltransferases HHAT(L): Facts and Implications
Source: J Dev Biol. 2016 Nov 5;4(4):33. doi: 10.3390/jdb4040033 (PMC5831804; doi:10.3390/jdb4040033)
Supplement: Supplementary file 1 [file jdb-04-00033-s001.zip › File S1.xls]

## Sheet: GUP1
	Organism	EntryName (UniProt)	Protein name	Length (a.a.)	Alias in other databases	100% identity with other proteins (in the same organism)
Yeasts	Candida albicans	Q5AKZ2	Uncharacterized protein (gene name GUP1)	584	EAL03422.1 (ncbi), EAL03546.1 (ncbi), XP_722191.1 (ncbi), XM_717098.1 (ncbi), XP_722305.1 (ncbi), XM_717212.1 (ncbi)	A0A0A4CEP8, A0A0A4B130, A0A0A4B2J5, A0A0A4AT49, A0A0A3EJ26, A0A0A3E9A0, A0A0A6LN05, A0A0A3CKN9
Yeasts	Candida dubliniensis	B9W9X2	Glycerol uptake protein, putative	591	CAX45610.1 (ncbi), XP_002417892.1 (ncbi)
Yeasts	Candida glabrata	Q6FS61	"unnamed protein product"	574	CAG59866.1 (ncbi), XP_446933.1 (ncbi), XM_446933.1 (ncbi)	-
Yeasts	Candida maltosa	M3IIF1	Glycerol uptake protein 1	559	EMG46111.1 (ncbi)
Yeasts	Candida orthopsilosis	H8X4T3	Gup1 O-acyltransferase	557	CCG23025.1 (ncbi), XP_003869162.1 (ncbi), XM_003869113.1 (ncbi)	-
Yeasts	Candida parapsilosis	G8BF95	Putative uncharacterized protein	557	CCE42528.1 (ncbi)
Yeasts	Candida tropicalis	Q7Z877	GUP1-like protein	582	AAQ16649.1 (ncbi)
Yeasts	Debaryomyces hansenii	Q6BSX8	DEHA2D05192p	570	CAG86831.2 (ncbi), XP_458692.2 (ncbi)
Yeasts	Kalmanozyma brasiliensis	V5ETE8	Glycerol uptake protein 1	632	EST05289.1 (ncbi)
Yeasts	Kazachstania naganishii	J7RSJ8	Uncharacterized protein	618	CCK72893.1 (ncbi)
Yeasts	Kluyveromyces delphensis	Q874L9	GUP1	574	AAO25613.1 (ncbi)
Yeasts	Kluyveromyces lactis	Q875N1	GUP1	587	AAO32600.1 (ncbi)
Yeasts	Kluyveromyces marxianus	A0A090BJN0	Glycerol uptake protein 1	589	BAP73091.1 (ncbi)	A0A090BJN0
Yeasts	Komagataella phaffii	F2QM81	Glycerol uptake protein 1	569	CCA36528.1 (ncbi)
Yeasts	Lachancea kluyveri	Q875R3	GUP1	579	AAO32569.1
Yeasts	Lachancea lanzarotensis	A0A0C7NAB5	LALA0S05e05380g1_1	590	CEP62426.1 (ncbi)
Yeasts	Lachancea thermotolerans	C5E2G3	KLTH0H04730p	597	CAR30224.1 (ncbi), XP_002556086.1 (ncbi)	XP_002556086.1
Yeasts	Lodderomyces elongisporus	A5E1P6	Glycerol uptake protein 1	232	EDK45354.1 (ncbi), XP_001525605.1 (ncbi)
Yeasts	Millerozyma farinosa	Q7Z888	Gup1p	505	AAQ01787.1 (ncbi)
Yeasts	Naumovozyma castellii	Q875Y0	GUP1	616	AAO32498.1 (ncbi)	G0VIT2
Yeasts	Phialophora attae	A0A0N1H934	Glycerol uptake protein 1	620	KPI39905.1 (ncbi)
Yeasts	Pseudozyma hubeiensis	R9P869	Glycerol uptake protein 1	624	GAC97593.1 (ncbi), XP_012191180.1 (ncbi)
Yeasts	Rhodosporidium toruloides	M7WHS1	Glycerol:H+ symporter Gup1	665	EMS20027.1 (ncbi)	A0A061B6H1
Yeasts	Saccharomyces bayanus	Q876H5	GUP1	318	AAO32400.1 (ncbi)
Yeasts	Saccharomyces cerevisiae	P53154	Glycerol uptake protein 1	560	S64091 (PIR), NP_011431.1 (ncbi), NM_001180949.1 (ncbi), DAA08021.1 (ncbi), CAA96789.1 (ncbi)	A0A024R2M3, UPI0005CFF9FF, C9JHL0, C9JEF1, C9JL39
Yeasts	Scheffersomyces stipitis	A3GI71	Glycerol transporter	565	EAZ63184.2 (ncbi), XP_001387207.2 (ncbi), XM_001387170.1 (ncbi)
Yeasts	Tetrapisispora blattae	I2GYZ5	Uncharacterized protein	601	CCH59347.1 (ncbi), XP_004178866.1 (ncbi)
Yeasts	Tetrapisispora phaffii	G8BYV6	Uncharacterized protein	595	CCE65048.1 (ncbi), XP_003687482.1 (ncbi)
Yeasts	Torulaspora delbrueckii	G8ZYP7	Uncharacterized protein	595	CCE93522.1 (ncbi), XP_003682733.1 (ncbi)
Yeasts	Vanderwaltozyma polyspora	A7TE93	Putative uncharacterized protein	606	EDO19415.1 (ncbi), XP_001647273.1 (ncbi)
Yeasts	Wickerhamomyces ciferrii	K0KML6	Glycerol uptake protein 1	576	CCH42614.1 (ncbi)
Yeasts	Yarrowia lipolytica	Q6C428	YALI0E30283p	569	CAG80188.1 (ncbi), XP_504584.1 (ncbi)
Yeasts	Zygosaccharomyces rouxii	C5DZY9	ZYRO0G08294p	624	CAR29423.1 (ncbi), XP_002498356.1 (ncbi)
Fungi	Arthroderma gypseum	E4UPN1	Glycerol uptake protein 1	654	EFQ99068.1 (ncbi), XP_003174551.1 (ncbi)
Fungi	Aspergillus clavatus	A1CEH0	Glycerol:H+ symporter (Gup1), putative	630	EAW11269.1 (ncbi), XP_001272695.1 (ncbi), XM_001272694.1 (ncbi)	-
Fungi	Aspergillus flavus	B8N497	Glycerol:H+ symporter (Gup1), putative	589	EED56238.1 (ncbi), XP_002375020.1 (ncbi), XM_002374979.1 (ncbi)	-
Fungi	Aspergillus fumigatus	A0A084BII2	Glycerol H+ symporter Gup1	629	KEY77361.1 (ncbi)	-
Fungi	Aspergillus lentulus	A0A0S7DNN6	Glycerol uptake protein 1	628	GAQ07061.1 (ncbi)
Fungi	Aspergillus nomius	A0A0L1IVG0	Putative glycerol:H+ symporter (Gup1)	451	KNG83178.1 (ncbi), XP_015404101.1 (ncbi), XM_015552689.1 (ncbi)	-
Fungi	Aspergillus ochraceoroseus	A0A0F8U398	Glycerol:H+ symporter (Gup1)	663	KKK14194.1 (ncbi)	-
Fungi	Aspergillus rambellii	A0A0F8XCP4	Glycerol:H+ symporter (Gup1)	664	KKK27290.1 (ncbi)	-
Fungi	Aspergillus udagawae	A0A0K8LTA4	Glycerol uptake protein 1	628	GAO90904.1 (ncbi)
Fungi	Beauveria bassiana	A0A0A2VJD3	Glycerol uptake protein 1	620	KGQ06225.1 (ncbi)
Fungi	Botryotinia fuckeliana	G2Y1X0	Similar to glycerol:H+ symporter (Gup1)	654	CCD46660.1 (ncbi)
Fungi	Byssochlamys spectabilis	V5FYA7	Glycerol:H+ symporter (Gup1), putative	631	GAD93602.1 (ncbi)
Fungi	Ceratocystis fimbriata	A0A0F8D3Q4	Glycerol uptake protein 1	621	KKF97352.1 (ncbi)
Fungi	Cordyceps militaris	G3JQX7	Glycerol: H+ symporter (Gup1), putative	619	EGX89421.1 (ncbi), XP_006672876.1 (ncbi), XM_006672813.1 (ncbi)
Fungi	Diaporthe ampelina	A0A0G2FLX2	Putative glycerol uptake protein 1	610	KKY35019.1 (ncbi)
Fungi	Escovopsis weberi	A0A0M8N783	Glycerol uptake protein 1	611	KOS21410.1 (ncbi)
Fungi	Eutypa lata	M7T4E3	Putative glycerol uptake protein 1 protein	626	EMR71748.1 (ncbi), XP_007789155.1 (ncbi)
Fungi	Fusarium langsethiae	A0A0M9EUF4	Glycerol uptake protein 1	621	KPA40129.1 (ncbi)
Fungi	Fusarium oxysporum	N4U1A1	Glycerol uptake protein 1	621	ENH69573.1 (ncbi)	W9PNU4
Fungi	Gaeumannomyces graminis	J3NI99	Glycerol uptake protein 1	615	EJT80992.1 (ncbi), XP_009217001.1 (ncbi)
Fungi	Hypsizygus marmoreus	A0A151WA45	Glycerol uptake protein 1	598	KYQ44667.1 (ncbi)
Fungi	Leptosphaeria maculans	E5A2Y8	Similar to glycerol:H+ symporter (Gup1)	637	CBX98001.1 (ncbi), XP_003841480.1 (ncbi), XM_003841432.1 (ncbi)
Fungi	Magnaporthe oryzae	G4N731	Glycerol uptake protein 1	622	EHA49944.1 (ncbi), XP_003716263.1 (ncbi)
Fungi	Magnaporthiopsis poae	A0A0C4E5G1	Glycerol uptake protein 1	539	KLU88743.1 (ncbi)
Fungi	Metarhizium acridum	E9EIE3	Glycerol:H+ symporter (Gup1), putative	620	EFY84318.1 (ncbi), XP_007815981.1 (ncbi), XM_007817790.1 (ncbi)
Fungi	Metarhizium anisopliae	A0A086NP78	Putative glycerol:H+ symporter (Gup1)	620	KFG82946.1 (ncbi)	A0A0B4GR56
Fungi	Mitosporidium daphniae	A0A098VUQ9	Gup1-like protein	577	KGG52604.1 (ncbi), XP_013239040.1 (ncbi), XM_013383586.1 (ncbi)
Fungi	Neonectria ditissima	A0A0P7BGF9	Glycerol uptake protein 1	618	KPM45838.1 (ncbi)
Fungi	Neosartorya fischeri	A1DFS3	Glycerol:H+ symporter (Gup1), putative	628	EAW18230.1 (ncbi), XP_001260127.1 (ncbi), XM_001260126.1 (ncbi)
Fungi	Neosartorya fumigata	B0XVF5	Glycerol:H+ symporter (Gup1), putative	629	EDP54155.1 (ncbi)	Q4WHK8
Fungi	Penicillium digitatum	K9GBT0	Glycerol:H+ symporter (Gup1), putative	633	EKV18622.1 (ncbi)		K9G4B9
Fungi	Penicillium roqueforti	W6QEY1	Glycerol uptake protein 1	634	CDM34611.1 (ncbi)
Fungi	Piriformospora indica	G4TC67	Probable GUP1-Multimembrane-spanning protein essential for proton symport of glycerol	579	CCA68899.1 (ncbi)
Fungi	Pyrenophora tritici-repentis	B2W8Y4	Glycerol:H+ symporter (Gup1)	637	EDU49362.1 (ncbi), XP_001936775.1 (ncbi), XM_001936740.1 (ncbi)
Fungi	Rhizoctonia solani	A0A074RY55	Glycerol:H+ symporter (GUP1)	588	KEP52031.1 (ncbi)
Fungi	Rhizopus microsporus	A0A0A1NKQ3	Putative Glycerol uptake protein 1	466	CEG68578.1 (ncbi), CEI97426.1 (ncbi)
Fungi	Rosellinia necatrix	A0A0P4UCJ5	Putative glycerol uptake protein 1	617	GAP88723.1 (ncbi)
Fungi	Scedosporium apiospermum	A0A084G4V3	Putative Glycerol:H+ symporter (Gup1)	623	KEZ42365.1 (ncbi)
Fungi	Sporisorium reilianum	E7A1P5	Probable GUP1-Multimembrane-spanning protein essential for proton symport of glycerol	624	CBQ73402.1 (ncbi)
Fungi	Sporisorium scitamineum	A0A127ZKK3	Probable GUP1-Multimembrane-spanning protein essential for proton symport of glycerol	630	CDU26277.1 (ncbi)
Fungi	Sporothrix schenckii	A0A0F2LVX8	Glycerol:H+ symporter (Gup1)	648	KJR80655.1 (ncbi)	U7Q4M7
Fungi	Talaromyces marneffei	B6Q3L6	Glycerol:H+ symporter (Gup1), putative	637	EEA28105.1 (ncbi), XP_002144620.1 (ncbi), XM_002144584.1 (ncbi)
Fungi	Talaromyces stipitatus	B8LT11	Glycerol:H symporter (Gup1), putative	647	EED23519.1 (ncbi), XP_002340906.1 (ncbi), XM_002340865.1 (ncbi)
Fungi	Thanatephorus cucumeris	A0A0B7FI25	Glycerol uptake protein 1	609	CEL55893.1 (ncbi)
Fungi	Togninia minima	R8BN58	Putative glycerol uptake protein 1 protein	495	EOO00828.1 (ncbi), XP_007914528.1 (ncbi)
Fungi	Tolypocladium ophioglossoides	A0A0L0NAB1	Glycerol uptake protein 1	654	KND91053.1 (ncbi)
Fungi	Trichophyton equinum	F2PNN0	Glycerol uptake protein 1	646	EGE03498.1 (ncbi),
Fungi	Uncinocarpus reesii	C4JFI9	GUP1 protein	544	EEP76154.1 (ncbi), XP_002541487.1 (ncbi), XM_002541441.1 (ncbi)
Fungi	Ustilago hordei	I2G0A0	Probable GUP1-Multimembrane-spanning protein essential for proton symport of glycerol	629	CCF52593.1 (ncbi)
Fungi	Wallemia ichthyophaga	R9AGX6	Glycerol uptake protein 1	470	EOR01458.1 (ncbi), XP_009267720.1 (ncbi)
Mammals	Ailuropoda melanoleuca	D2HSV1	"Uncharacterized protein" (gene name HHATL)	503	EFB20513.1 (ncbi), XP_011231106.1 (ncbi), XM_011232804.1 (ncbi)
Mammals	Bos taurus	Q0IIH6	Hedgehog acyltransferase-like	504	AAI22643.1 (ncbi), NP_001071397.1 (ncbi), NM_001077929.1 (ncbi), Bt.25689 (unigene)
Mammals	Callithrix jacchus	U3E9L8	Protein-cysteine N-palmitoyltransferase HHAT-like protein	507	JAB41242.1 (ncbi)
Mammals	Camelus ferus	S9X7V4	Hedgehog acyltransferase-like isoform 1	507	EPY83649.1 (ncbi)
Mammals	Canis lupus familiaris	E2QVP2	"Uncharacterized protein" (gene name HHATL)	504	XP_005634366.1 (ncbi), XM_005634309.2 (ncbi), XP_013962018.1 (ncbi), XM_014106543.1 (ncbi), XP_534234.2 (ncbi), XM_534234.5 (ncbi)	UPI0006B3D423
Mammals	Cavia porcellus	H0W8D2	"Uncharacterized protein" (gene name HHATL)	504	XP_003477054.1 (ncbi), XM_003477006.3 (ncbi)
Mammals	Chlorocebus sabaeus	A0A0D9RW21	"Uncharacterized protein" (gene name HHATL)	504	XP_007982001.1 (ncbi), XM_007983810.1 (ncbi), XP_007982002.1 (ncbi), XM_007983811.1 (ncbi), XP_007982003.1 (ncbi), XM_007983812.1 (ncbi), XP_007982004.1 (ncbi), XM_007983813.1 (ncbi)
Mammals	Cricetulus griseus	G3H982	Protein-cysteine N-palmitoyltransferase HHAT-like protein	456	EGW04098.1 (ncbi)
Mammals	Equus caballus	F7CSR9	"Uncharacterized protein" (gene name HHATL)	366	XP_014587002.1 (ncbi), XM_014731516.1 (ncbi)
Mammals	Felis catus	M3VUY1	"Uncharacterized protein" (gene name HHATL)	537	-
Mammals	Fukomys damarensis	A0A091DSQ8	Protein-cysteine N-palmitoyltransferase HHAT-like protein	549	KFO33295.1 (ncbi)	UPI00053F9372, UPI00053F76A7
Mammals	Gorilla gorilla	G3QVU8	"Uncharacterized protein" (gene name HHATL)	504	XP_004033974.1 (ncbi), XM_004033926.1 (ncbi), XP_004033975.1 (ncbi), XM_004033927.1 (ncbi)
Mammals	Heterocephalus glaber	A0A0P6JLK5	Protein-cysteine N-palmitoyltransferase HHAT-like protein	506	XP_004835146.1 (ncbi), XM_004835089.1 (ncbi), XP_004835147.1 (ncbi), XM_004835090.1 (ncbi), XP_004835148.1 (ncbi), XM_004835091.2 (ncbi)
Mammals	Homo sapiens	Q9HCP6	Protein-cysteine N-palmitoyltransferase HHAT-like protein	504	BAB17758.1 (ncbi), AAH22529.1 (ncbi), BAA86487.1 (ncbi), CCDS2704.1 (ccds), NP_065758.3 (ncbi), NM_020707.3 (ncbi), XP_006713337.1 (ncbi), XM_006713274.1 (ncbi), Hs.476041 (unigene)	A0A024R2M3, C9JEF1, UPI0005CFF9FF, C9JL39, C9JHL0
Mammals	Ictidomys tridecemlineatus	I3M0Q9	Uncharacterized protein (gene name HHATL)	504	XP_005337982.1 (ncbi), XM_005337925.2 (ncbi)	UPI0006816625
Mammals	Macaca mulatta	H9EUU5	Protein-cysteine N-palmitoyltransferase HHAT-like protein	504	AFE66154.1 (ncbi), Mmu.24191 (unigene)	G7NY66
Mammals	Monodelphis domestica	F6VVX3	Uncharacterized protein (gene name HHATL)	504	XP_001377263.1 (ncbi), XM_001377226.2 (ncbi), XP_007499851.1 (ncbi), XM_007499789.1 (ncbi)
Mammals	Mus musculus	Q9D1G3	Protein-cysteine N-palmitoyltransferase HHAT-like protein	503	BAB22885.1 (ncbi), BAE34266.1 (ncbi), AAH24464.1 (ncbi), CCDS23638.1 (ccds), NP_083371.2 (ncbi), NM_029095.2 (ncbi), XP_006512442.1 (ncbi), XM_006512379.2 (ncbi), XP_006512443.1 (ncbi), XM_006512380.2 (ncbi), XP_006512444.1 (ncbi), XM_006512381.2 (ncbi), Mm.44195 (unigene)	UPI0003D71291
Mammals	Mustela putorius	M3YKA1	Uncharacterized protein (gene name HHATL)	504	XP_004754324.1 (ncbi), XM_004754267.2 (ncbi), XP_004754325.1 (ncbi), XM_004754268.2 (ncbi), XP_012912599.1 (ncbi), XM_013057145.1 (ncbi)	G9K494
Mammals	Myotis davidii	L5LFK5	Protein-cysteine N-palmitoyltransferase HHAT-like protein	504	ELK25109.1 (ncbi), XP_006770572.1 (ncbi), XP_015423861.1 (ncbi), XP_015423862.1 (ncbi), XP_015423863.1 (ncbi)
Mammals	Neovison vison	U6DPN0	Protein-cysteine N-palmitoyltransferase HHAT-like protein	356	CCP84915.1 (ncbi)
Mammals	Nomascus leucogenys	G1R1L9	Uncharacterized protein (gene name HHATL)	402
Mammals	Ornithorhynchus anatinus	F6Q975	Uncharacterized protein (gene name HHATL)	372	-
Mammals	Oryctolagus cuniculus	G1T4U9	Uncharacterized protein (gene name HHATL)	504	-
Mammals	Otolemur garnettii	H0X4N6	Uncharacterized protein (gene name HHATL)	504	XP_003794548.1 (ncbi), XM_003794500.2 (ncbi)
Mammals	Ovis aries	W5P0R1	Uncharacterized protein (gene name HHATL)	504	XP_004018302.3 (ncbi), XM_004018253.3 (ncbi), XP_011954844.1 (ncbi), XM_012099454.2 (ncbi), XP_011954845.1 (ncbi), XM_012099455.2 (ncbi)
Mammals	Papio anubis	A0A096MZB3	Uncharacterized protein (gene name HHATL)	504	XP_003894649.1 (ncbi), XM_003894600.2 (ncbi), XP_009199347.1 (ncbi), XM_009201083.1 (ncbi)
Mammals	Pongo abelii	H2PB21	Uncharacterized protein (gene name HHATL)	504	XP_002813922.1 (ncbi), XM_002813876.3 (ncbi)
Mammals	Pteropus alecto	L5KFK9	Protein-cysteine N-palmitoyltransferase HHAT-like protein	504	ELK10117.1 (ncbi), XP_006914888.1 (ncbi)
Mammals	Rattus norvegicus	D4A9P9	Gup1, glycerol uptake/transporter homolog (Yeast)	503	EDL76817.2 (ncbi), NP_001100338.1 (ncbi), NM_001106868.1 (ncbi), XP_006244152.1 (ncbi), XM_006244090.2 (ncbi), Rn.22829 (unigene)	-
Mammals	Sarcophilus harrisii	G3VYN4	"Uncharacterized protein" (gene name HHATL)	504	XP_003762315.1 (ncbi), XM_003762267.1 (ncbi)
Mammals	Sus scrofa	F1SRF0	Uncharacterized protein (gene name HHATL)	504		UPI0003AEABC1
Mammals	Tupaia chinensis	L9KA21	Protein-cysteine N-palmitoyltransferase HHAT-like protein	574	ELW58277.1 (ncbi)
Fishes	Dicentrarchus labrax	E6ZIV3	Protein-cysteine N-palmitoyltransferase HHAT-like protein	538	CBN81987.1 (ncbi)
Fishes	Oreochromis niloticus	I3JEL1	Uncharacterized protein (gene name HHATL)	533	XP_003439244.1 (ncbi), XM_003439196.2 (ncbi)
Fishes	Oryzias latipes	H2M0A2	Uncharacterized protein (gene name HHATL)	508	-
Fishes	Poeciliopsis prolifica	A0A0S7GZP0	HHATL	510	JAO32829.1 (ncbi), JAO32830.1 (ncbi)
Fishes	Salmo salar	C0HBD0	Protein-cysteine N-palmitoyltransferase HHAT-like protein	527	NP_001167319.1 (ncbi), NM_001173848.1 (ncbi), XP_013996889.1 (ncbi), XM_014141414.1 (ncbi)
Fishes	Takifugu rubripes	H2V733	Uncharacterized protein (gene name HHATL)	534	XP_003968039.1 (ncbi), XM_003967990.2 (ncbi)
Reptiles	Alligator mississippiensis	A0A151PD60	Protein-cysteine N-palmitoyltransferase HHAT-like protein	503	KYO47047.1 (ncbi)
Reptiles	Anolis carolinensis	G1KFQ4	"Uncharacterized protein" (gene name HHATL)	465	-
Reptiles	Ophiophagus hannah	V8NIU3	Protein-cysteine N-palmitoyltransferase HHAT-like protein	374	ETE61558.1 (ncbi)
Birds	Acanthisitta chloris	A0A091MPN7	Protein-cysteine N-palmitoyltransferase HHAT-like	504	KFP79118.1 (ncbi), XP_009071646.1 (ncbi)
Birds	Amazona aestiva	A0A0Q3R646	Protein-cysteine N-palmitoyltransferase HHAT-like protein	503	KQK80865.1 (ncbi)
Birds	Anas platyrhynchos	V5FYA7	Protein-cysteine N-palmitoyltransferase HHAT-like protein	503	EOA98599.1 (ncbi), XP_005023302.1 (ncbi), XM_005023245.2 (ncbi)
Birds	Antrostomus carolinensis	A0A094L316	Protein-cysteine N-palmitoyltransferase HHAT-like	273	KFZ63877.1 (ncbi)	UPI000528B2F6
Birds	Aptenodytes forsteri	A0A087QVN7	Protein-cysteine N-palmitoyltransferase HHAT-like	503	KFM05291.1 (ncbi), XP_009274220.1 (ncbi)	UPI0004F464F5
Birds	Buceros rhinoceros silvestris	A0A091HHM1	Protein-cysteine N-palmitoyltransferase HHAT-like	273	KFO94215.1 (ncbi)	UPI0005293E1D
Birds	Cariama cristata	A0A091MLM7	Protein-cysteine N-palmitoyltransferase HHAT-like	503	KFP62455.1 (ncbi), XP_009693298.1 (ncbi)
Birds	Cathartes aura	A0A091L7J7	Protein-cysteine N-palmitoyltransferase HHAT-like	503	KFP51802.1 (ncbi)
Birds	Charadrius vociferus	A0A0A0A6N5	Protein-cysteine N-palmitoyltransferase HHAT-like	503	KGL89572.1 (ncbi), XP_009878795.1 (ncbi)
Birds	Chlamydotis macqueenii	A0A091LS39	Protein-cysteine N-palmitoyltransferase HHAT-like	503	KFP45591.1 (ncbi), XP_010126326.1 (ncbi)	UPI00051EFB01
Birds	Colius striatus	A0A091K573	Protein-cysteine N-palmitoyltransferase HHAT-like	273	KFP31476.1 (ncbi)	UPI000529A491
Birds	Corvus brachyrhynchos	A0A091FY07	Protein-cysteine N-palmitoyltransferase HHAT-like	505	KFO66155.1 (ncbi), XP_008641326.1 (ncbi)
Birds	Cuculus canorus	A0A091FYC6	Protein-cysteine N-palmitoyltransferase HHAT-like	498	KFO74199.1 (ncbi), XP_009556562.1 (ncbi)
Birds	Egretta garzetta	A0A091J1B1	Protein-cysteine N-palmitoyltransferase HHAT-like	503	KFP14377.1 (ncbi)
Birds	Eurypyga helias	A0A093J376	Protein-cysteine N-palmitoyltransferase HHAT-like	274	KFW09440.1 (ncbi)
Birds	Ficedula albicollis	U3JE59	"Uncharacterized protein" (gene name HHATL)	504	XP_005040545.1 (ncbi), XM_005040488.1 (ncbi)
Birds	Fulmarus glacialis	A0A093II37	Protein-cysteine N-palmitoyltransferase HHAT-like	507	KFV99276.1 (ncbi)
Birds	Gallus gallus	E1C1S6	"Uncharacterized protein" (gene name HHATL)	503	NP_001186505.1 (ncbi), NM_001199576.1 (ncbi), XP_015136567.1 (ncbi), XM_015281081.1 (ncbi)
Birds	Haliaeetus albicilla	A0A091PP40	Protein-cysteine N-palmitoyltransferase HHAT-like	502	KFQ09647.1 (ncbi), XP_009924255.1 (ncbi)
Birds	Manacus vitellinus	A0A093Q6A4	Protein-cysteine N-palmitoyltransferase HHAT-like	504	KFW79707.1 (ncbi), XP_008920642.1 (ncbi)
Birds	Merops nubicus	A0A091QI48	Protein-cysteine N-palmitoyltransferase HHAT-like	273	KFQ26285.1 (ncbi)	UPI0004F0A409
Birds	Nestor notabilis	A0A091RYZ8	Protein-cysteine N-palmitoyltransferase HHAT-like	503	KFQ47489.1 (ncbi), XP_010010645.1 (ncbi)
Birds	Nipponia nippon	A0A091W0P4	Protein-cysteine N-palmitoyltransferase HHAT-like	503	KFR09009.1 (ncbi), XP_009473609.1 (ncbi)
Birds	Opisthocomus hoazin	A0A091VS91	Protein-cysteine N-palmitoyltransferase HHAT-like	503	KFR05605.1 (ncbi), XP_009929314.1 (ncbi)
Birds	Pelecanus crispus	A0A091TT97	Protein-cysteine N-palmitoyltransferase HHAT-like	503	KFQ61876.1 (ncbi), XP_009482416.1 (ncbi)
Birds	Phalacrocorax carbo	A0A093TL39	Protein-cysteine N-palmitoyltransferase HHAT-like	503	KFW94969.1 (ncbi), XP_009510409.1 (ncbi)
Birds	Picoides pubescens	A0A093G5N3	Protein-cysteine N-palmitoyltransferase HHAT-like	503	KFV65505.1 (ncbi), XP_009896435.1 (ncbi)
Birds	Podiceps cristatus	A0A094NRW8	Protein-cysteine N-palmitoyltransferase HHAT-like	503	KFZ69121.1 (ncbi)
Birds	Pterocles gutturalis	A0A093BTD4	Protein-cysteine N-palmitoyltransferase HHAT-like	503	KFV02936.1 (ncbi), XP_010071846.1 (ncbi)
Birds	Pygoscelis adeliae	A0A093PNF9	Protein-cysteine N-palmitoyltransferase HHAT-like	503	KFW73662.1 (ncbi), XP_009331564.1 (ncbi)
Birds	Struthio camelus australis	A0A093HWT6	Protein-cysteine N-palmitoyltransferase HHAT-like	503	KFV86111.1 (ncbi), XP_009682487.1 (ncbi), XP_009682488.1 (ncbi), XP_009682489.1 (ncbi)
Birds	Taeniopygia guttata	H0YPS0	Uncharacterized protein (gene name HHATL)	503
Birds	Tauraco erythrolophus	A0A093C0T6	Protein-cysteine N-palmitoyltransferase HHAT-like	418	KFV08038.1 (ncbi)	PI000523BF80
Birds	Tinamus guttatus	A0A099Z4B3	Protein-cysteine N-palmitoyltransferase HHAT-like	503	KGL77324.1 (ncbi), XP_010213063.1 (ncbi)
Birds	Tyto alba	A0A093FNQ0	Protein-cysteine N-palmitoyltransferase HHAT-like	468	KFV58235.1 (ncbi)	UPI000523B0DA
Amphibia	Xenopus laevis	Q7ZYD3	MGC53261 protein	503	NP_001079492.1 (ncbi), NM_001086023.1 (ncbi), Xl.14328 (ncbi)
Amphibia	Xenopus tropicalis	F7DYR5	Uncharacterized protein (gene name HHATL)	505
Testudines	Chelonia mydas	M7BRH0	Protein-cysteine N-palmitoyltransferase HHAT-like protein	503	EMP39804.1 (ncbi), XP_007055612.1 (ncbi)
Testudines	Pelodiscus sinensis	K7GJG5	Uncharacterized protein (gene name HHATL)	503	XP_006120671.1 (ncbi),XM_006120609.2 (ncbi)
Arthropods	Sarcoptes scabiei	A0A132A795	Protein-cysteine N-palmitoyltransferase HHAT-like protein	481	KPM06843.1 (ncbi)
Arthropods	Stegodyphus mimosarum	A0A087UUB1	Protein-cysteine N-palmitoyltransferase HHAT-like protein	250	KFM80950.1 (ncbi)
Teleostomes	Latimeria chalumnae	H3A4F9	Uncharacterized protein (gene name HHATL)	507	XP_006011627.1 (ncbi), XM_006011565.2 (ncbi)
Teleostomes	Scleropages formosus	A0A0P7Y498	Protein-cysteine N-palmitoyltransferase HHAT-like protein-like	486	KPP60483.1 (ncbi)
"Others"	Trypanosoma cruzi	K4DX85	GUP1, putative	609	EKG02994.1 (ncbi)
"Others"	Zea mays	B6T822	GUP1	519	ACG33255.1 (ncbi), NP_001148875.1 (ncbi), NM_001155403.1 (ncbi), Zm.31057 (unigene)
"Others"	Dunaliella tertiolecta	L7WG65	Glycerol uptake protein 1	388	AGC79720.1 (ncbi)
"Others"	Fundulus heteroclitus	A0A146ZLJ6	Cysteine N-palmitoyltransferase HHAT-like protein	647	JAR67244.1 (ncbi)	UPI000644EC62

## Sheet: GUP2
	Organism	EntryName (UniProt)	Protein name	Length (a.a.)	Alias in other databases	100% identity with other proteins (in the same organism)
Yeasts	Saccharomyces cerevisiae	Q08929	Glycerol uptake protein 2	609	CAA97902.1 (ncbi), CAA97901.1 (ncbi), DAA11246.1 (ncbi), S65208 (PIR), NP_015135.1 (ncbi)	A6ZW65, A0A0D4Z8Y6, N1NWN9, N1P2N4
Yeasts	Saccharomyces eubayanus	A0A0L8RAC9	GUP2-like protein	616	KOG96131.1 (ncbi)
Mammals	Ailuropoda melanoleuca	G1L2L3	Uncharacterized protein (gene name HHAT)	413
Mammals	Bos mutus	L8J069	Protein-cysteine N-palmitoyltransferase HHAT	348	ELR61628.1 (ncbi)	UPI0003C03BC7
Mammals	Callithrix jacchus	F7I7Y8	Uncharacterized protein (gene name HHAT)	401
Mammals	Canis lupus familiaris	E2RSZ2	Uncharacterized protein (gene name HHAT)	493	XP_537140.3 (ncbi)
Mammals	Cavia porcellus	H0V009	Uncharacterized protein (gene name HHAT)	493		UPI00022B79B3
Mammals	Chlorocebus sabaeus	A0A0D9RRZ4	Uncharacterized protein (gene name HHAT)	514
Mammals	Equus caballus	F6ZY77	Uncharacterized protein (gene name HHAT)	493	XP_001489753.1 (ncbi), XP_014595100.1 (ncbi), XP_014595101.1 (ncbi)	UPI000717DA16
Mammals	Felis catus	M3WED6	Uncharacterized protein (gene name HHAT)	491		UPI00072E9535
Mammals	Fukomys damarensis	A0A091CPW5	Protein-cysteine N-palmitoyltransferase HHAT	493	KFO19683.1 (ncbi)
Mammals	Heterocephalus glaber	G5BAN0	Protein-cysteine N-palmitoyltransferase HHAT	465	EHB06341.1 (ncbi)
Mammals	Homo sapiens	Q5VTY9	Protein-cysteine N-palmitoyltransferase HHAT	493	BAA91772.1 (ncbi), BAH12521.1 (ncbi), BAH12917.1 (ncbi), BAH13854.1 (ncbi), BAH14561.1 (ncbi), BAH14895.1 (ncbi), CAI56771.1 (ncbi), CAH70523.1 (ncbi), CAI23103.1 (ncbi), CAI23104.1 (ncbi), CAI22284.1 (ncbi), CAI17039.1 (ncbi), EAW93427.1 (ncbi), EAW93427.1 (ncbi), EAW93428.1 (ncbi), EAW93430.1 (ncbi), AAI17131.1 (ncbi), CAB42852.1 (ncbi), CCDS1495.1 (ccds), CCDS53471.1 (ccds), CCDS53472.1 (ccds)…	B1AK61, UPI0003EAF9CD, UPI0002065169, UPI0005D036F3, A0A075B6R5, UPI0005D007DD, UPI0005D03F7B
Mammals	Ictidomys tridecemlineatus	I3MIB1	Uncharacterized protein (gene name HHAT)	463		UPI00038BC27E, UPI00038C1FC6
Mammals	Loxodonta africana	G3TPV5	Uncharacterized protein (gene name HHAT)	492		UPI0002234435
Mammals	Monodelphis domestica	F7FUH3	Uncharacterized protein (gene name HHAT)	493	XP_001366478.1 (ncbi), XP_007481398.1 (ncbi), XP_007481399.1 (ncbi)	UPI0004435FF6
Mammals	Mus musculus	Q8BMT9	Protein-cysteine N-palmitoyltransferase HHAT	499	BAC25829.1 (ncbi), BAE42837.1 (ncbi), CAO82115.1 (ncbi), AAH08159.1 (ncbi), CCDS15628.1 (ccds), NP_659130.2 (ncbi), NM_144881.4 (ncbi), Mm.145857 (unigene)
Mammals	Mustela putorius furo	M3XVJ7	Uncharacterized protein (gene name HHAT)	493	XP_004775370.1 (ncbi), XP_012902669.1 (ncbi)	G9K493, UPI0003445C42, G9K492, G9K491
Mammals	Myotis brandtii	S7MWF4	Protein-cysteine N-palmitoyltransferase HHAT	212	EPQ07800.1 (ncbi)
Mammals	Myotis lucifugus	G1PRB6	Uncharacterized protein (gene name HHAT)	494
Mammals	Nomascus leucogenys	G1QPJ0	Uncharacterized protein (gene name HHAT)	493	XP_003273071.1 (ncbi), XP_003273072.1 (ncbi), XP_003273073.1 (ncbi)	UPI00062AB0D4, UPI00062A81DA
Mammals	Ornithorhynchus anatinus	F7CDD1	Uncharacterized protein (gene name HHAT)	492
Mammals	Otolemur garnettii	H0WUF7	Uncharacterized protein (gene name HHAT)	492
Mammals	Ovis aries	W5PRM3	Uncharacterized protein (gene name HHAT)	240
Mammals	Pan troglodytes	K7DGJ9	Hedgehog acyltransferase	493	JAA33172.1 (ncbi)
Mammals	Papio anubis	A0A096MUS7	Uncharacterized protein (gene name HHAT)	493		UPI0004F1E3EE
Mammals	Pteropus alecto	L5KZA7	Protein-cysteine N-palmitoyltransferase HHAT	468	ELK16138.1 (ncbi)
Mammals	Rattus norvegicus	M0R7X5	Protein Hhat	493
Mammals	Sarcophilus harrisii	G3VW02	Uncharacterized protein (gene name HHAT)	493	XP_003767720.1 (ncbi)
Mammals	Sus scrofa	F1S2U1	Uncharacterized protein (gene name HHAT)	493	XP_003130472.2 (ncbi), XP_005667927.1 (ncbi), XP_005667936.1 (ncbi), Ssc.2587 (unigene)	UPI0006B1AC3A, UPI0003AEC945
Mammals	Tupaia chinensis	L9JBN4	Protein-cysteine N-palmitoyltransferase HHAT	352	ELW47783.1 (ncbi)
Fishes	Astyanax mexicanus	W5K4Q5	PREDICTED: protein-cysteine N-palmitoyltransferase HHAT	525	XP_015461641.1 (ncbi)
Fishes	Danio rerio	A8WG41	Hhat protein	494	AAI54570.1 (ncbi), Dr.134188 (unigene)	A8WG41
Fishes	Fundulus heteroclitus	A0A146VC47	Cysteine N-palmitoyltransferase HHAT	585	JAR14935.1 (ncbi)
Fishes	Latimeria chalumnae	M3XKJ8	Uncharacterized protein (gene name HHAT)	413
Fishes	Oreochromis niloticus	I3IXG3	Uncharacterized protein (gene name HHAT)	491		UPI000393DD3A
Fishes	Oryzias latipes	H2LGK1	Uncharacterized protein (gene name HHAT)	462		UPI0005CB9B9B
Fishes	Poeciliopsis prolifica	A0A0S7ITD6	HHAT	201	JAO55290.1 (ncbi)
Fishes	Schistocephalus solidus	A0A0V0J4P5	Protein-cysteine N-palmitoyltransferase HHAT	509	JAP60565.1 (ncbi)	A0A0X3Q262, A0A0X3NVX5
Fishes	Takifugu rubripes	H2RXH0	Uncharacterized protein (gene name HHAT)	486		UPI000298E276
Birds	Acanthisitta chloris	A0A091NGU3	Protein-cysteine N-palmitoyltransferase HHAT	297	KFP77793.1 (ncbi)
Birds	Amazona aestiva	A0A0Q3XAN1	Protein-cysteine N-palmitoyltransferase HHAT	284	KQL60919.1 (ncbi)
Birds	Anas platyrhynchos	R0JCN1	Protein-cysteine N-palmitoyltransferase HHAT	421	EOA95000.1 (ncbi)
Birds	Apaloderma vittatum	A0A091NA08	Protein-cysteine N-palmitoyltransferase HHAT	235	KFP86301.1 (ncbi)
Birds	Aptenodytes forsteri	A0A087R2S4	Protein-cysteine N-palmitoyltransferase HHAT	364	KFM07778.1 (ncbi)
Birds	Balearica regulorum gibbericeps	A0A087VQ50	Protein-cysteine N-palmitoyltransferase HHAT	297	KFO14742.1 (ncbi)
Birds	Buceros rhinoceros silvestris	A0A091HG56	Protein-cysteine N-palmitoyltransferase HHAT	297	KFO86363.1 (ncbi)	UPI00052812DB
Birds	Calypte anna	A0A091ITK4	Protein-cysteine N-palmitoyltransferase HHAT	348	KFP02976.1	UPI0004C115D4
Birds	Cariama cristata	A0A091M0T7	Protein-cysteine N-palmitoyltransferase HHAT	235	KFP64262.1 (ncbi)
Birds	Cathartes aura	A0A091LV78	Protein-cysteine N-palmitoyltransferase HHAT	235	KFP50211.1 (ncbi)
Birds	Chaetura pelagica	A0A093BEG9	Protein-cysteine N-palmitoyltransferase HHAT	364	KFU84314.1 (ncbi)
Birds	Charadrius vociferus	A0A0A0A191	Protein-cysteine N-palmitoyltransferase HHAT	362	KGL86785.1
Birds	Corvus brachyrhynchos	A0A091F4X4	Protein-cysteine N-palmitoyltransferase HHAT	364	KFO65178.1 (ncbi)
Birds	Cuculus canorus	A0A091G1N9	Protein-cysteine N-palmitoyltransferase HHAT	364	KFO75099.1 (ncbi)
Birds	Egretta garzetta	A0A091K3E8	Protein-cysteine N-palmitoyltransferase HHAT	364	KFP18301.1 (ncbi)
Birds	Eurypyga helias	A0A093J210	Protein-cysteine N-palmitoyltransferase HHAT	297	KFW05019.1 (ncbi)
Birds	Ficedula albicollis	U3KDL1	Uncharacterized protein (gene name HHAT)	493	XP_005043170.1 (ncbi)	UPI0007AD962A
Birds	Fulmarus glacialis	A0A093IM53	Protein-cysteine N-palmitoyltransferase HHAT	235	KFW00692.1 (ncbi)
Birds	Gallus gallus	F1NHW1	Uncharacterized protein (gene name HHAT)	476
Birds	Manacus vitellinus	A0A093QJG3	Protein-cysteine N-palmitoyltransferase HHAT	364	KFW89058.1 (ncbi)
Birds	Meleagris gallopavo	G1NC31	Uncharacterized protein (gene name HHAT)	463		UPI0002034DE9
Birds	Merops nubicus	A0A091QZ08	Protein-cysteine N-palmitoyltransferase HHAT	285	KFQ32194.1 (ncbi)
Birds	Mesitornis unicolor	A0A091QSB6	Protein-cysteine N-palmitoyltransferase HHAT	294	KFQ30093.1 (ncbi)
Birds	Nestor notabilis	A0A091RPJ5	Protein-cysteine N-palmitoyltransferase HHAT	283	KFQ44373.1 (ncbi)
Birds	Nipponia nippon	A0A091VSJ1	Protein-cysteine N-palmitoyltransferase HHAT	362	KFR06189.1 (ncbi)
Birds	Pelecanus crispus	A0A091TCD5	Protein-cysteine N-palmitoyltransferase HHAT	296	KFQ56516.1 (ncbi)
Birds	Phaethon lepturus	A0A091TDZ4	Protein-cysteine N-palmitoyltransferase HHAT	297	KFQ72536.1 (ncbi)
Birds	Phalacrocorax carbo	A0A093QW58	Protein-cysteine N-palmitoyltransferase HHAT	297	KFW92801.1 (ncbi)
Birds	Picoides pubescens	A0A093GBY4	Protein-cysteine N-palmitoyltransferase HHAT	364	KFV64377.1 (ncbi)
Birds	Pygoscelis adeliae	A0A093RKM4	Protein-cysteine N-palmitoyltransferase HHAT	364	KFW71464.1 (ncbi)
Birds	Struthio camelus australis	A0A093HGY2	Protein-cysteine N-palmitoyltransferase HHAT	360	KFV78262.1 (ncbi)	UPI00051E19AC
Birds	Taeniopygia guttata	H0YYD5	Uncharacterized protein (gene name HHAT)	364
Birds	Tinamus guttatus	A0A099ZM89	Protein-cysteine N-palmitoyltransferase HHAT	360	KGL83574.1 (ncbi)	UPI00052F081E
Nematodes	Ascaris suum	F1L3V9	Protein-cysteine N-palmitoyltransferase HHAT	528	ADY44813.1 (ncbi)
Nematodes	Caenorhabditis briggsae	A8XCB8	Protein CBR-HHAT-1	519	CAP30285.1 (ncbi), XP_002646634.1 (ncbi)
Nematodes	Caenorhabditis elegans	G5EFT7	Homolog of Hedgehog AcylTransferase	519	CAE18034.1 (ncbi), NP_001022489.1 (ncbi), Cel.24907 (unigene)
Nematodes	Caenorhabditis remanei	E3MHR6	CRE-HHAT-1 protein	517	EFP02181.1 (ncbi), XP_003104259.1 (ncbi)
Nematodes	Loa loa	E1GLY7	Hhat protein	528	EFO14321.2 (ncbi)
Nematodes	Trichinella britovi	A0A0V1CGW5	Protein-cysteine N-palmitoyltransferase HHAT	552	KRY48465.1 (ncbi)
Nematodes	Trichinella nelsoni	A0A0V0RNH6	Protein-cysteine N-palmitoyltransferase HHAT	518	KRX16048.1 (ncbi)
Nematodes	Trichinella pseudospiralis	A0A0V1IA08	Protein-cysteine N-palmitoyltransferase HHAT	518	KRZ19667.1 (ncbi), KRZ33383.1 (ncbi)
Nematodes	Trichinella sp.	A0A0V0UPL8	Protein-cysteine N-palmitoyltransferase HHAT	552	KRX53226.1 (ncbi)
Nematodes	Trichinella spiralis	A0A0V1BIH9	Protein-cysteine N-palmitoyltransferase HHAT	788	KRY36939.1 (ncbi)
Arthropods	Amblyomma cajennense	A0A023FP03	Protein-cysteine n-palmitoyltransferase hhat	269	JAC23481.1 (ncbi)
Arthropods	Amblyomma triste	A0A023G4Z4	Protein-cysteine n-palmitoyltransferase hhat	529	JAC28884 (ncbi)
Arthropods	Hyalomma excavatum	A0A131XIV2	Protein-cysteine n-palmitoyltransferase hhat	512	JAP67059.1 (ncbi)
Arthropods	Lygus hesperus	A0A0A9Z625	Glycerol uptake protein 2	146	JAG37255.1 (ncbi)
Arthropods	Rhipicephalus appendiculatus	A0A131YHR1	Protein cysteine n palmitoyltransferase hhat	522	JAP78779.1 (ncbi)
Testudines	Chelonia mydas	M7C9Z3	Protein-cysteine N-palmitoyltransferase HHAT	126	EMP37452.1 (ncbi)
Testudines	Pelodiscus sinensis	K7FFN4	Uncharacterized protein (gene name HHAT)	497	XP_006136963.1 (ncbi)	UPI0003C48717
"Others"	Xenopus tropicalis	F6YU00	Uncharacterized protein (gene name HHAT)	350
"Others"	Hydra vulgaris	T2MCA7	Protein-cysteine N-palmitoyltransferase HHAT	495	CDG69562.1 (ncbi), XP_012554158.1 (ncbi)
"Others"	Alligator mississippiensis	A0A151P3M4	Protein-cysteine N-palmitoyltransferase HHAT	487	KYO43652.1
"Others"	Daphnia magna	A0A0P5YT65	Cysteine N-palmitoyltransferase HHAT	495	JAM49953.1 (ncbi)
"Others"	Ceratitis capitata	W8C871	Protein-cysteine N-palmitoyltransferase Rasp	495	JAC03382.1 (ncbi)
"Others"	Drosophila melanogaster	Q9VZU2	Protein-cysteine N-palmitoyltransferase Rasp	500	AAK73748.1 (ncbi), AAK97480.1 (ncbi), AAF47725.1 (ncbi), AAM51062.1 (ncbi), NP_523898.1 (ncbi), Dm.2681 (unigene)	H0RNG9
"Others"	Ophiophagus hannah	V8PFI1	Protein-cysteine N-palmitoyltransferase HHAT	278	ETE73100.1 (ncbi)
"Others"	Strongylocentrotus purpuratus	W4XLB4	Uncharacterized protein (gene name HHAT)	837
"Others"	Echinococcus granulosus	A0A068WFJ8	Membrane bound acyltransferase:hhat	412	CDS16379.1 (ncbi)
"Others"	Hymenolepis microstoma	A0A068XG50	Membrane bound acyltransferase:hhat	624	CDS29019.2 (ncbi)
"Others"	Schistosoma mansoni	G4V8B9	Putative membrane-bound acyltransferase/hhat	382	CCD75064.1 (ncbi)
