# Supplementary material for: Yeast Gup1(2) Proteins Are Homologues of the Hedgehog Morphogens Acyltransferases HHAT(L): Facts and Implications
Source: J Dev Biol. 2016 Nov 5;4(4):33. doi: 10.3390/jdb4040033 (PMC5831804; doi:10.3390/jdb4040033)
Supplement: Supplementary file 1 [file jdb-04-00033-s001.zip › File S2.xls]

## Sheet: GUP1_yeasts
YEASTS	Kalmanozyma_brasiliensis	Pseudozyma_hubeiensis	Rhodosporidium_toruloides	Lachancea_lanzarotensis	Lachancea_thermotolerans	Kluyveromyces_lactis	Kluyveromyces_marxianus	Zygosaccharomyces_rouxii	Candida_glabrata	Wickerhamomyces_ciferrii	Vanderwaltozyma_polyspora	Tetrapisispora_phaffii	Kazachstania_naganishii	Tetrapisispora_blattae	Lachancea_kluyveri	Kluyveromyces_delphensis	Torulaspora_delbrueckii	Naumovozyma_castellii	Saccharomyces_bayanus	Saccharomyces_cerevisiae	Phialophora_attae	Yarrowia_lipolytica	Komagataella_phaffii	Millerozyma_farinosa	Candida_albicans	Candida_dubliniensis	Candida_maltosa	Candida_tropicalis	Scheffersomyces_stipitis	Debaryomyces_hansenii	Candida_orthopsilosis	Candida_parapsilosis	Lodderomyces_elongisporus
Kalmanozyma_brasiliensis	100	80.19	49.62	43.94	46.06	42.43	43.34	42.42	41.11	42.83	41.98	44.68	44.15	42.4	45.25	42.69	44.89	44.23	57.2	44.51	44.89	44.54	44.38	41.75	43.03	43.59	43.65	44.62	43.81	41.87	43.74	43.74	52.05
Pseudozyma_hubeiensis	80.19	100	46.68	41.4	42.65	40.85	40.98	40.52	38.4	40.43	42.66	43.52	42.94	41.92	43.41	41.77	40.67	43.86	52.44	43.26	40.48	40.84	40.48	37.5	39.36	40	41.01	41.75	40.78	38.36	41.32	41.32	46.76
Rhodosporidium_toruloides	49.62	46.68	100	40.89	41.87	41.44	40.89	41.05	41.81	42.8	41.59	39.96	42.67	40.43	43.48	42.13	43.45	43.02	54.26	42.42	44.91	43.58	40.16	39.76	41.22	41.37	43.79	42.77	41.3	41.27	42.16	42.77	54.39
Lachancea_lanzarotensis	43.94	41.4	40.89	100	75.28	65.2	64	58.79	55.58	61.6	61.4	60.55	57.92	61.64	70.93	57.45	64.68	66.1	71.32	65.4	46.22	48.58	57.72	53.32	56.26	56.32	56.8	56.54	59.12	60.64	58.45	58.86	67.25
Lachancea_thermotolerans	46.06	42.65	41.87	75.28	100	65.33	63.76	57.84	56.42	59.81	61.58	59.57	59.03	62.4	71.37	60.43	65.59	65.41	73.26	67	47.13	49.6	58.05	54.27	57.11	56.97	58.22	57	60.12	60.28	58.86	59.88	67.84
Kluyveromyces_lactis	42.43	40.85	41.44	65.2	65.33	100	81.4	55.89	59.57	59.14	60.67	60.98	59.01	60.31	68.62	59.88	63.58	65.58	70.54	64.2	45.29	49.29	59.28	52.84	58.65	57.51	60.77	59.51	61.04	59.19	58.37	58.98	63.74
Kluyveromyces_marxianus	43.34	40.98	40.89	64	63.76	81.4	100	54.17	56.39	58.64	59.06	57.23	58.41	60.08	66.73	56.69	61.42	65.9	68.99	63.6	46.8	47.37	58.28	51.42	57.74	57.2	58.01	57.98	58.52	58.27	57.64	57.43	63.16
Zygosaccharomyces_rouxii	42.42	40.52	41.05	58.79	57.84	55.89	54.17	100	57.78	54.76	60.41	58.24	55.15	57.46	60.5	55.64	63.19	60.83	68.6	63.2	43.66	46.67	51.39	50.47	51.88	52.36	54.56	54.17	52.51	53.55	52.75	52.55	63.16
Candida_glabrata	41.11	38.4	41.81	55.58	56.42	59.57	56.39	57.78	100	56.21	59.34	56.23	58.37	60.7	58.76	66.86	63.16	62.57	72.48	63.78	44.36	47.53	53.96	50.48	54.42	54.6	57.11	55.91	53.72	54.11	53.06	53.27	63.16
Wickerhamomyces_ciferrii	42.83	40.43	42.8	61.6	59.81	59.14	58.64	54.76	56.21	100	60.08	60.67	57.17	61.3	65.29	56.52	62.11	63.87	73.26	61.65	46.49	48.47	61.24	54.03	57.31	58.17	58.54	57.29	61.65	62.02	61.43	61.63	63.74
Vanderwaltozyma_polyspora	41.98	42.66	41.59	61.4	61.58	60.67	59.06	60.41	59.34	60.08	100	67.04	62.45	68.76	67.2	62.84	65.01	68.34	73.64	68.21	45.42	48.78	57.95	54.74	59.2	59.44	59.43	60	59.92	58.41	59.67	59.88	72.51
Tetrapisispora_phaffii	44.68	43.52	39.96	60.55	59.57	60.98	57.23	58.24	56.23	60.67	67.04	100	59.06	65.67	63.02	58.75	64.85	63.91	74.42	64.99	44.55	45.51	56.14	52.02	56.6	57.46	56.28	55.81	56.51	58.11	57.43	57.03	65.5
Kazachstania_naganishii	44.15	42.94	42.67	57.92	59.03	59.01	58.41	55.15	58.37	57.17	62.45	59.06	100	63.45	60.31	62.65	64.68	67.22	76.74	68.2	45.74	46.59	53.27	49.88	54.53	54.6	56.28	54.78	57.6	56.81	56.5	57.93	64.91
Tetrapisispora_blattae	42.4	41.92	40.43	61.64	62.4	60.31	60.08	57.46	60.7	61.3	68.76	65.67	63.45	100	65.61	62.26	66.48	70.95	77.13	70.42	46.39	48.36	56.77	52.86	58.52	58.68	56.3	57.78	58.15	57.82	58.98	59.18	67.84
Lachancea_kluyveri	45.25	43.41	43.48	70.93	71.37	68.62	66.73	60.5	58.76	65.29	67.2	63.02	60.31	65.61	100	61.68	69.01	70.66	77.13	70.08	49.7	49.9	59.6	58.1	61.87	62.83	62.47	61.81	65.51	65.3	62.73	63.35	70.18
Kluyveromyces_delphensis	42.69	41.77	42.13	57.45	60.43	59.88	56.69	55.64	66.86	56.52	62.84	58.75	62.65	62.26	61.68	100	62.06	64.79	77.13	68.81	43.96	47.42	53.05	50.12	55.73	55.71	56.62	55.51	57.66	57.11	56.03	57.67	63.16
Torulaspora_delbrueckii	44.89	40.67	43.45	64.68	65.59	63.58	61.42	63.19	63.16	62.11	65.01	64.85	64.68	66.48	69.01	62.06	100	70.99	79.46	71.4	45.12	51.94	56.05	54.89	59.2	59.76	60.69	60.23	61.49	58.48	59.51	59.3	65.5
Naumovozyma_castellii	44.23	43.86	43.02	66.1	65.41	65.58	65.9	60.83	62.57	63.87	68.34	63.91	67.22	70.95	70.66	64.79	70.99	100	79.84	74.2	46.48	49.39	56.51	54.18	59.24	60.4	59.47	60.43	61.49	62.31	60.33	61.76	67.84
Saccharomyces_bayanus	57.2	52.44	54.26	71.32	73.26	70.54	68.99	68.6	72.48	73.26	73.64	74.42	76.74	77.13	77.13	77.13	79.46	79.84	100	92.64	56.25	61.09	67.83	67.44	68.6	69.77	67.83	66.67	69.77	69.38	66.67	67.83	64.91
Saccharomyces_cerevisiae	44.51	43.26	42.42	65.4	67	64.2	63.6	63.2	63.78	61.65	68.21	64.99	68.2	70.42	70.08	68.81	71.4	74.2	92.64	100	48.68	50.1	57.79	54.31	60.12	61.84	59.59	60.16	62.99	62.83	59.92	60.12	63.16
Phialophora_attae	44.89	40.48	44.91	46.22	47.13	45.29	46.8	43.66	44.36	46.49	45.42	44.55	45.74	46.39	49.7	43.96	45.12	46.48	56.25	48.68	100	48.47	48.17	42.89	46.56	46.02	47.57	46.67	46.79	47.15	48.37	48.98	56.4
Yarrowia_lipolytica	44.54	40.84	43.58	48.58	49.6	49.29	47.37	46.67	47.53	48.47	48.78	45.51	46.59	48.36	49.9	47.42	51.94	49.39	61.09	50.1	48.47	100	51.1	48.6	51.81	52.3	53.32	52.58	53.48	52.58	52.29	53.12	66.08
Komagataella_phaffii	44.38	40.48	40.16	57.72	58.05	59.28	58.28	51.39	53.96	61.24	57.95	56.14	53.27	56.77	59.6	53.05	56.05	56.51	67.83	57.79	48.17	51.1	100	57.41	60.76	60.79	60.78	59.71	62.88	64.49	63.3	63.09	70.18
Millerozyma_farinosa	41.75	37.5	39.76	53.32	54.27	52.84	51.42	50.47	50.48	54.03	54.74	52.02	49.88	52.86	58.1	50.12	54.89	54.18	67.44	54.31	42.89	48.6	57.41	100	59.82	61.42	61.85	62.12	65.18	63.76	63.57	62.62	72.09
Candida_albicans	43.03	39.36	41.22	56.26	57.11	58.65	57.74	51.88	54.42	57.31	59.2	56.6	54.53	58.52	61.87	55.73	59.2	59.24	68.6	60.12	46.56	51.81	60.76	59.82	100	90.08	78.67	78.96	66.73	68.74	72.43	71.23	75.58
Candida_dubliniensis	43.59	40	41.37	56.32	56.97	57.51	57.2	52.36	54.6	58.17	59.44	57.46	54.6	58.68	62.83	55.71	59.76	60.4	69.77	61.84	46.02	52.3	60.79	61.42	90.08	100	79.56	79.28	67.33	68.53	72.84	71.63	75.58
Candida_maltosa	43.65	41.01	43.79	56.8	58.22	60.77	58.01	54.56	57.11	58.54	59.43	56.28	56.28	56.3	62.47	56.62	60.69	59.47	67.83	59.59	47.57	53.32	60.78	61.85	78.67	79.56	100	84.57	67.33	65.53	70.56	71.77	76.16
Candida_tropicalis	44.62	41.75	42.77	56.54	57	59.51	57.98	54.17	55.91	57.29	60	55.81	54.78	57.78	61.81	55.51	60.23	60.43	66.67	60.16	46.67	52.58	59.71	62.12	78.96	79.28	84.57	100	69.06	66.22	71.77	70.77	73.26
Scheffersomyces_stipitis	43.81	40.78	41.3	59.12	60.12	61.04	58.52	52.51	53.72	61.65	59.92	56.51	57.6	58.15	65.51	57.66	61.49	61.49	69.77	62.99	46.79	53.48	62.88	65.18	66.73	67.33	67.33	69.06	100	75.3	69.42	70.42	71.51
Debaryomyces_hansenii	41.87	38.36	41.27	60.64	60.28	59.19	58.27	53.55	54.11	62.02	58.41	58.11	56.81	57.82	65.3	57.11	58.48	62.31	69.38	62.83	47.15	52.58	64.49	63.76	68.74	68.53	65.53	66.22	75.3	100	69.82	69.22	74.42
Candida_orthopsilosis	43.74	41.32	42.16	58.45	58.86	58.37	57.64	52.75	53.06	61.43	59.67	57.43	56.5	58.98	62.73	56.03	59.51	60.33	66.67	59.92	48.37	52.29	63.3	63.57	72.43	72.84	70.56	71.77	69.42	69.82	100	90.54	81.4
Candida_parapsilosis	43.74	41.32	42.77	58.86	59.88	58.98	57.43	52.55	53.27	61.63	59.88	57.03	57.93	59.18	63.35	57.67	59.3	61.76	67.83	60.12	48.98	53.12	63.09	62.62	71.23	71.63	71.77	70.77	70.42	69.22	90.54	100	81.4
Lodderomyces_elongisporus	52.05	46.76	54.39	67.25	67.84	63.74	63.16	63.16	63.16	63.74	72.51	65.5	64.91	67.84	70.18	63.16	65.5	67.84	64.91	63.16	56.4	66.08	70.18	72.09	75.58	75.58	76.16	73.26	71.51	74.42	81.4	81.4	100

## Sheet: GUP1_fungi
OTHER_FUNGI	Ceratocystis_fimbriata	Eutypa_lata	Neonectria_ditissima	Fusarium_langsethiae	Fusarium_oxysporum	Beauveria_bassiana	Cordyceps_militaris	Escovopsis_weberi	Tolypocladium_ophioglossoides	Metarhizium_acridum	Metarhizium_anisopliae	Rosellinia_necatrix	Botryotinia_fuckeliana	Magnaporthe_oryzae	Gaeumannomyces_graminis	Magnaporthiopsis_poae	Sporothrix_schenckii	Scedosporium_apiospermum	Diaporthe_ampelina	Togninia_minima	Leptosphaeria_maculans	Pyrenophora_tritici-repentis	Uncinocarpus_reesii	Talaromyces_marneffei	Talaromyces_stipitatus	Arthroderma_gypseum	Trichophyton_equinum	Penicillium_digitatum	Penicillium_roqueforti	Byssochlamys_spectabilis	Aspergillus_flavus	Aspergillus_nomius	Aspergillus_ochraceoroseus	Aspergillus_rambellii	Aspergillus_clavatus	Aspergillus_udagawae	Aspergillus_lentulus	Neosartorya_fischeri	Aspergillus_fumigatus	Neosartorya_fumigata	Mitosporidium_daphniae	Wallemia_ichthyophaga	Rhizopus_microsporus	Ustilago_hordei	Sporisorium_reilianum	Sporisorium_scitamineum	Piriformospora_indica	Hypsizygus_marmoreus	Rhizoctonia_solani
Ceratocystis_fimbriata	100	54.51	57.74	59.89	60.25	59.67	61.41	57.82	61.8	61.84	62.39	55.98	56.86	58.84	58.39	59.32	59.29	59.67	57.59	61.68	51.34	51.43	52.23	50.81	52.52	54.3	54.76	51.64	52.46	53.82	54.62	55.44	52.79	52.7	54.76	53.16	52.8	52.98	52.8	52.44	35.96	44.01	43.25	42.43	42.06	42.13	43.6	45.6	41.84
Eutypa_lata	54.51	100	54.53	57.58	58.48	58.56	59.21	59.23	59.49	57.48	57.3	65.64	56.23	58.44	58	62.89	58.79	55.58	59.78	63.05	51.88	53.05	51.86	49.91	50	53.32	53.78	50.54	50.45	55.88	56.29	53.28	52.06	51.79	53.32	53.6	52.52	52.34	52.78	52.78	37.2	43.18	41.5	39.36	38.61	39.06	40.35	43.5	42.28
Neonectria_ditissima	57.74	54.53	100	69.35	69.71	65.11	66.19	65.38	66.06	67.63	67.99	60.48	58.59	61.1	59.93	59.83	61.22	62.09	58.04	64.75	50.73	50.82	50.51	51.18	51.27	53.75	54.03	51.82	51.18	56.43	56.5	55	54.28	54.18	57.22	54.56	55.11	55.47	55.01	54.83	35.96	42.34	43.25	42.26	42.64	42.83	41.44	42.66	42.28
Fusarium_langsethiae	59.89	57.58	69.35	100	93.94	71.33	71.68	73.04	73.49	72.76	72.22	62.27	62.34	63.8	62.48	64.06	66.55	67.39	62.98	67.05	57.07	56.99	54.55	54.25	53.08	59.2	58.58	55.84	54.83	59.34	57.87	57.63	56.08	56.16	58.47	58	58.55	58.55	58.44	58.44	37.78	44.57	43	43.43	43.81	44.95	44.94	45.6	44.7
Fusarium_oxysporum	60.25	58.48	69.71	93.94	100	71.33	70.79	71.95	73.31	72.04	71.86	62.09	62.34	65.63	62.48	65.33	65.65	68.11	62.98	68.43	57.43	56.99	56.06	54.07	52.54	58.65	58.03	57.12	55.19	59.52	58.27	57.89	56.44	56.52	59.02	58.91	59.09	59.09	58.26	58.62	37.78	44.01	43.5	43.81	44	45.14	45.14	45.79	45.09
Beauveria_bassiana	59.67	58.56	65.11	71.33	71.33	100	89.98	72.99	76.14	74.37	74.19	62.04	63.2	66.67	66.12	66.17	69.59	66.43	63.84	68.36	54.51	54.43	57.54	53.71	54.15	57.35	57.45	54.2	54.1	58.94	59.06	58.42	57.14	57.04	61.71	59.09	59.45	59.82	59.17	59.17	37.98	43.45	42.75	44.02	43.83	43.64	43.58	45.4	42.77
Cordyceps_militaris	61.41	59.21	66.19	71.68	70.79	89.98	100	70.07	76.09	73.66	73.3	62.89	62.41	65.51	66.3	67.23	69.18	65.7	62.92	69.28	55.15	55.43	57.43	53.71	53.71	57.64	57.74	54.56	52.82	59.78	58.27	58.42	57.07	56.96	61.64	59.27	60.18	60.18	59.17	59.17	37.98	42.34	42.75	42.59	42.59	43.16	43.58	45.6	42.58
Escovopsis_weberi	57.82	59.23	65.38	73.04	71.95	72.99	70.07	100	76.19	75.09	75.27	64.47	62.36	65.88	66.3	66.38	69.95	64.96	62.99	68.24	54.56	54.48	55.47	55.11	54.11	57.82	57.38	56.35	55.7	59.56	60	59.36	57.12	57.56	59.78	58.83	59.38	59.38	59.02	59.02	36.57	43.45	44	44.21	45.54	45.54	44.96	45.6	45.11
Tolypocladium_ophioglossoides	61.8	59.49	66.06	73.49	73.31	76.14	76.09	76.19	100	79.6	80.33	64.72	62.88	68.49	67.9	69.53	69.18	67.82	65.92	71.83	55.88	56.88	54.23	56.31	56.94	60.22	59.96	57.93	56.91	61.21	59.84	59.09	58.29	58.36	59.39	60.69	60.88	61.06	60.15	60.15	37.37	44.57	44.25	41.98	44	43.45	45.05	46.97	44.04
Metarhizium_acridum	61.84	57.48	67.63	72.76	72.04	74.37	73.66	75.09	79.6	100	96.79	63.14	63.55	65.76	64.61	65.68	70.3	67.81	64.71	71.36	55.96	55.15	56.28	56.4	55.6	58.26	57.45	58	57.35	61.24	61.37	60.79	58.95	59.03	61.52	61.78	60.51	60.51	60.22	60.04	38.79	44.01	45.5	44.02	44.78	45.92	45.54	45.79	45.87
Metarhizium_anisopliae	62.39	57.3	67.99	72.22	71.86	74.19	73.3	75.27	80.33	96.79	100	64.05	63.2	65.76	63.88	65.26	70.3	67.81	64.71	71.59	56.14	54.97	56.03	57.3	56.32	58.44	57.82	58	57.71	61.06	61.96	61.84	59.49	59.57	62.07	62.32	61.23	61.41	60.76	60.58	38.99	43.73	44.75	42.88	44.21	44.97	45.16	45.99	45.49
Rosellinia_necatrix	55.98	65.64	60.48	62.27	62.09	62.04	62.89	64.47	64.72	63.14	64.05	100	60.43	63.16	61.17	64.89	62.12	60.36	60.52	65.88	54.5	55.32	52.5	54.69	54.71	56.4	56.94	55.47	54.83	59.82	57.37	56.57	54.51	54.41	57.76	57.32	58.05	58.23	58.05	58.05	38.41	45.68	43.11	41.24	43.13	43.4	42.64	45.1	42.97
Botryotinia_fuckeliana	56.86	56.23	58.59	62.34	62.34	63.2	62.41	62.36	62.88	63.55	63.2	60.43	100	61.57	59.39	60.46	61.22	60.78	59.96	65.05	54.72	55.42	57.49	55.24	56.01	58.51	59.58	54.12	55.1	59.21	56.07	54.07	55.5	55.57	59.19	59.82	59.46	58.57	58.82	58.65	40.08	45.13	46.75	42.83	41.91	42.17	44.1	46.97	43.98
Magnaporthe_oryzae	58.84	58.44	61.1	63.8	65.63	66.67	65.51	65.88	68.49	65.76	65.76	63.16	61.57	100	74.41	76.01	68.29	64.61	63.27	70.96	54.61	54.43	56.89	56.26	54.71	57.4	58.48	54.4	54.66	60.4	58.27	57.6	55.36	55.44	58.05	57.35	57.53	57.17	57.71	57.35	38.1	45.4	42.25	43.34	43.53	43.61	44.08	44.81	43.65
Gaeumannomyces_graminis	58.39	58	59.93	62.48	62.48	66.12	66.3	66.3	67.9	64.61	63.88	61.17	59.39	74.41	100	91.02	67.75	62.34	61.44	69.68	53.45	52.64	56.85	54.35	54.28	59.31	58.97	55.45	54.45	60.85	57.45	57.14	55.9	55.98	59.41	58.03	57.66	57.66	58.11	58.11	39.35	44.01	41.75	43.02	43.4	43.1	42.11	45.08	43.88
Magnaporthiopsis_poae	59.32	62.89	59.83	64.06	65.33	66.17	67.23	66.38	69.53	65.68	65.26	64.89	60.46	76.01	91.02	100	68.27	64.3	63.47	70.14	56.12	55.37	58.18	53.99	54.97	59.53	60	56.21	55.46	62.39	58.02	56.61	56.42	56.51	60.08	59.11	58.47	58.05	58.56	58.56	40.98	44.29	42.46	43.4	44.52	43.5	43.94	47.92	43.96
Sporothrix_schenckii	59.29	58.79	61.22	66.55	65.65	69.59	69.18	69.95	69.18	70.3	70.3	62.12	61.22	68.29	67.75	68.27	100	64.83	65.45	71.26	54.2	54.99	54.81	56.23	55.91	57.62	58.17	55.4	56.01	62.43	57.06	58.05	55.24	55.32	60.04	59.14	60.39	60.22	60.11	60.11	38.26	45.68	41.25	43.83	44.2	45.2	45.07	46.97	46.93
Scedosporium_apiospermum	59.67	55.58	62.09	67.39	68.11	66.43	65.7	64.96	67.82	67.81	67.81	60.36	60.78	64.61	62.34	64.3	64.83	100	65.33	70.97	54.94	55.58	54.61	54.3	53.61	55.86	56.6	56.24	54.33	59.53	57.2	57.52	54.94	55.02	57.76	56.68	56.86	56.5	56.58	56.22	38.06	46.52	45.5	44.91	45.47	45.75	43.52	46.97	45.02
Diaporthe_ampelina	57.59	59.78	58.04	62.98	62.98	63.84	62.92	62.99	65.92	64.71	64.71	60.52	59.96	63.27	61.44	63.47	65.45	65.33	100	72.64	55.25	54.43	57.62	55.6	54.24	58.23	58.07	55.66	55.19	60.52	58.01	55.94	54.41	54.5	58.52	57.3	56.93	56.56	56.64	56.27	37.84	45.96	42.61	44.57	44.38	45.05	45.42	48.59	47.14
Togninia_minima	61.68	63.05	64.75	67.05	68.43	68.36	69.28	68.24	71.83	71.36	71.59	65.88	65.05	70.96	69.68	70.14	71.26	70.97	72.64	100	57.94	58.97	60.66	58.37	57.91	61.27	61.79	59.91	58.84	65.96	60.75	57.82	59.44	59.3	61.97	62.68	62.44	61.97	61.36	60.89	40.3	45.13	44.68	46.78	48.27	48.02	45.34	49.25	47.49
Leptosphaeria_maculans	51.34	51.88	50.73	57.07	57.43	54.51	55.15	54.56	55.88	55.96	56.14	54.5	54.72	54.61	53.45	56.12	54.2	54.94	55.25	57.94	100	80.7	55.18	58.75	57.55	58.32	58.49	58.38	57.37	61.94	59.3	58.73	58.04	58.29	61.63	59.68	59.86	59.5	59.5	59.68	38.99	45.83	45	41.11	41.67	41.74	45.56	46.29	45.61
Pyrenophora_tritici-repentis	51.43	53.05	50.82	56.99	56.99	54.43	55.43	54.48	56.88	55.15	54.97	55.32	55.42	54.43	52.64	55.37	54.99	55.58	54.43	58.97	80.7	100	54.46	59.29	57.73	59.37	59.02	57.48	56.29	61.51	58.53	58.42	57.14	57.4	61.28	59.86	60.04	59.14	59.32	59.5	40.08	46.11	46.23	41.56	42.12	42.57	45.35	47.06	46.36
Uncinocarpus_reesii	52.23	51.86	50.51	54.55	56.06	57.54	57.43	55.47	54.23	56.28	56.03	52.5	57.49	56.89	56.85	58.18	54.81	54.61	57.62	60.66	55.18	54.46	100	58.35	58.71	64.22	64.85	59.41	57.95	65.37	56.56	53.95	59.76	59.76	61.88	60.2	60.44	59.95	60.2	60.44	36.49	40.28	41.93	38.31	36.83	38.22	42.28	42.42	41.07
Talaromyces_marneffei	50.81	49.91	51.18	54.25	54.07	53.71	53.71	55.11	56.31	56.4	57.3	54.69	55.24	56.26	54.35	53.99	56.23	54.3	55.6	58.37	58.75	59.29	58.35	100	83.94	64.39	64.32	60.95	62.06	69.08	64.52	63.33	65.62	65.51	69.01	67.9	67.02	67.2	66.9	67.08	39.88	42.62	46.37	45.11	44.17	45.57	44.96	47.75	47.22
Talaromyces_stipitatus	52.52	50	51.27	53.08	52.54	54.15	53.71	54.11	56.94	55.6	56.32	54.71	56.01	54.71	54.28	54.97	55.91	53.61	54.24	57.91	57.55	57.73	58.71	83.94	100	64.81	65.1	62.04	63.68	67.84	64.89	63.94	65.68	65.57	68.12	67.91	66.13	66.67	66.02	66.19	40.4	43.45	46.87	46.65	45.91	47.03	46.6	48.14	47.31
Arthroderma_gypseum	54.3	53.32	53.75	59.2	58.65	57.35	57.64	57.82	60.22	58.26	58.44	56.4	58.51	57.4	59.31	59.53	57.62	55.86	58.23	61.27	58.32	59.37	64.22	64.39	64.81	100	93.69	63.89	64.31	70.3	67.75	68.05	65.63	66.03	69.28	68.9	68.55	68.2	68.55	68.73	41.33	44.85	46	43.36	43.36	44.55	46.03	45.99	46.46
Trichophyton_equinum	54.76	53.78	54.03	58.58	58.03	57.45	57.74	57.38	59.96	57.45	57.82	56.94	59.58	58.48	58.97	60	58.17	56.6	58.07	61.79	58.49	59.02	64.85	64.32	65.1	93.69	100	64.54	64.6	72.89	67.11	67.19	66.37	66.43	70.28	69.03	68.5	68.5	68.5	68.85	41.01	44.85	46.87	44.73	44.18	45	47	46.77	46.85
Penicillium_digitatum	51.64	50.54	51.82	55.84	57.12	54.2	54.56	56.35	57.93	58	58	55.47	54.12	54.4	55.45	56.21	55.4	56.24	55.66	59.91	58.38	57.48	59.41	60.95	62.04	63.89	64.54	100	88.66	71.96	67.93	68.21	68.19	68.77	68.74	67.79	67.79	67.97	67.32	67.5	38.95	44.69	48.24	45.16	45.73	46.01	46.88	46.94	46.23
Penicillium_roqueforti	52.46	50.45	51.18	54.83	55.19	54.1	52.82	55.7	56.91	57.35	57.71	54.83	55.1	54.66	54.45	55.46	56.01	54.33	55.19	58.84	57.37	56.29	57.95	62.06	63.68	64.31	64.6	88.66	100	72.73	67.8	66.5	68.6	68.48	68.26	67.85	67.5	68.21	67.91	68.09	38.87	45.13	47.12	45.27	45.27	45.73	46.2	47.05	46.33
Byssochlamys_spectabilis	53.82	55.88	56.43	59.34	59.52	58.94	59.78	59.56	61.21	61.24	61.06	59.82	59.21	60.4	60.85	62.39	62.43	59.53	60.52	65.96	61.94	61.51	65.37	69.08	67.84	70.3	72.89	71.96	72.73	100	70.13	70.08	73.85	73.72	74.11	73.17	74.24	74.06	74.29	74.46	42.07	44.69	48.99	47	46.63	47.65	47.96	47.45	48.27
Aspergillus_flavus	54.62	56.29	56.5	57.87	58.27	59.06	58.27	60	59.84	61.37	61.96	57.37	56.07	58.27	57.45	58.02	57.06	57.2	58.01	60.75	59.3	58.53	56.56	64.52	64.89	67.75	67.11	67.93	67.8	70.13	100	92.82	73.19	73.43	74.67	75.53	75.14	75.33	74.43	74.43	40.86	46.24	45.8	45.51	46.33	46.01	48.21	48.61	48.33
Aspergillus_nomius	55.44	53.28	55	57.63	57.89	58.42	58.42	59.36	59.09	60.79	61.84	56.57	54.07	57.6	57.14	56.61	58.05	57.52	55.94	57.82	58.73	58.42	53.95	63.33	63.94	68.05	67.19	68.21	66.5	70.08	92.82	100	71.98	72.56	74.42	75.39	74.09	73.83	72.61	72.87	41.88	45.16	47.46	47.03	48.73	47.88	48.99	48.27	48.43
Aspergillus_ochraceoroseus	52.79	52.06	54.28	56.08	56.44	57.14	57.07	57.12	58.29	58.95	59.49	54.51	55.5	55.36	55.9	56.42	55.24	54.94	54.41	59.44	58.04	57.14	59.76	65.62	65.68	65.63	66.37	68.19	68.6	73.85	73.19	71.98	100	99.34	76.32	75.8	76.15	75.62	75.49	75.66	39.56	42.46	45.5	46.28	45.35	45.62	47.57	46.67	45.87
Aspergillus_rambellii	52.7	51.79	54.18	56.16	56.52	57.04	56.96	57.56	58.36	59.03	59.57	54.41	55.57	55.44	55.98	56.51	55.32	55.02	54.5	59.3	58.29	57.4	59.76	65.51	65.57	66.03	66.43	68.77	68.48	73.72	73.43	72.56	99.34	100	76.36	76.37	76.72	76.19	76.06	76.23	39.09	42.34	45.75	46.2	45.64	45.91	47.67	46.77	45.98
Aspergillus_clavatus	54.76	53.32	57.22	58.47	59.02	61.71	61.64	59.78	59.39	61.52	62.07	57.76	59.19	58.05	59.41	60.08	60.04	57.76	58.52	61.97	61.63	61.28	61.88	69.01	68.12	69.28	70.28	68.74	68.26	74.11	74.67	74.42	76.32	76.36	100	81.98	82.33	82.86	82.01	82.36	41.21	45.4	44.36	43.77	43.09	43.52	49.13	47.75	46.85
Aspergillus_udagawae	53.16	53.6	54.56	58	58.91	59.09	59.27	58.83	60.69	61.78	62.32	57.32	59.82	57.35	58.03	59.11	59.14	56.68	57.3	62.68	59.68	59.86	60.2	67.9	67.91	68.9	69.03	67.79	67.85	73.17	75.53	75.39	75.8	76.37	81.98	100	91.73	92.25	91.02	91.37	41.21	43.73	46.12	43.34	44.47	44.55	48.26	47.16	46.55
Aspergillus_lentulus	52.8	52.52	55.11	58.55	59.09	59.45	60.18	59.38	60.88	60.51	61.23	58.05	59.46	57.53	57.66	58.47	60.39	56.86	56.93	62.44	59.86	60.04	60.44	67.02	66.13	68.55	68.5	67.79	67.5	74.24	75.14	74.09	76.15	76.72	82.33	91.73	100	97.01	95.42	95.77	41.82	44.29	45.36	43.34	44.47	44.36	48.06	47.36	46.36
Neosartorya_fischeri	52.98	52.34	55.47	58.55	59.09	59.82	60.18	59.38	61.06	60.51	61.41	58.23	58.57	57.17	57.66	58.05	60.22	56.5	56.56	61.97	59.5	59.14	59.95	67.2	66.67	68.2	68.5	67.97	68.21	74.06	75.33	73.83	75.62	76.19	82.86	92.25	97.01	100	97.36	97.71	41.62	44.01	45.36	43.15	45.03	45.3	47.87	46.97	46.17
Aspergillus_fumigatus	52.8	52.78	55.01	58.44	58.26	59.17	59.17	59.02	60.15	60.22	60.76	58.05	58.82	57.71	58.11	58.56	60.11	56.58	56.64	61.36	59.5	59.32	60.2	66.9	66.02	68.55	68.5	67.32	67.91	74.29	74.43	72.61	75.49	76.06	82.01	91.02	95.42	97.36	100	99.65	41.01	43.73	45.61	42.96	44.65	44.74	47.29	46.38	45.98
Neosartorya_fumigata	52.44	52.78	54.83	58.44	58.62	59.17	59.17	59.02	60.15	60.04	60.58	58.05	58.65	57.35	58.11	58.56	60.11	56.22	56.27	60.89	59.68	59.5	60.44	67.08	66.19	68.73	68.85	67.5	68.09	74.46	74.43	72.87	75.66	76.23	82.36	91.37	95.77	97.71	99.65	100	41.21	44.01	45.61	42.96	44.65	44.74	47.67	46.38	45.98
Mitosporidium_daphniae	35.96	37.2	35.96	37.78	37.78	37.98	37.98	36.57	37.37	38.79	38.99	38.41	40.08	38.1	39.35	40.98	38.26	38.06	37.84	40.3	38.99	40.08	36.49	39.88	40.4	41.33	41.01	38.95	38.87	42.07	40.86	41.88	39.56	39.09	41.21	41.21	41.82	41.62	41.01	41.21	100	42.5	42.75	39.2	39.2	38.2	42.21	42.13	40.73
Wallemia_ichthyophaga	44.01	43.18	42.34	44.57	44.01	43.45	42.34	43.45	44.57	44.01	43.73	45.68	45.13	45.4	44.01	44.29	45.68	46.52	45.96	45.13	45.83	46.11	40.28	42.62	43.45	44.85	44.85	44.69	45.13	44.69	46.24	45.16	42.46	42.34	45.4	43.73	44.29	44.01	43.73	44.01	42.5	100	43.25	50	50.56	49.17	50.56	52.81	51.65
Rhizopus_microsporus	43.25	41.5	43.25	43	43.5	42.75	42.75	44	44.25	45.5	44.75	43.11	46.75	42.25	41.75	42.46	41.25	45.5	42.61	44.68	45	46.23	41.93	46.37	46.87	46	46.87	48.24	47.12	48.99	45.8	47.46	45.5	45.75	44.36	46.12	45.36	45.36	45.61	45.61	42.75	43.25	100	45.39	44.64	44.39	45.32	49.62	48.87
Ustilago_hordei	42.43	39.36	42.26	43.43	43.81	44.02	42.59	44.21	41.98	44.02	42.88	41.24	42.83	43.34	43.02	43.4	43.83	44.91	44.57	46.78	41.11	41.56	38.31	45.11	46.65	43.36	44.73	45.16	45.27	47	45.51	47.03	46.28	46.2	43.77	43.34	43.34	43.15	42.96	42.96	39.2	50	45.39	100	80.99	79.72	54.44	52.93	54.49
Sporisorium_reilianum	42.06	38.61	42.64	43.81	44	43.83	42.59	45.54	44	44.78	44.21	43.13	41.91	43.53	43.4	44.52	44.2	45.47	44.38	48.27	41.67	42.12	36.83	44.17	45.91	43.36	44.18	45.73	45.27	46.63	46.33	48.73	45.35	45.64	43.09	44.47	44.47	45.03	44.65	44.65	39.2	50.56	44.64	80.99	100	90.05	54.05	52.24	53.92
Sporisorium_scitamineum	42.13	39.06	42.83	44.95	45.14	43.64	43.16	45.54	43.45	45.92	44.97	43.4	42.17	43.61	43.1	43.5	45.2	45.75	45.05	48.02	41.74	42.57	38.22	45.57	47.03	44.55	45	46.01	45.73	47.65	46.01	47.88	45.62	45.91	43.52	44.55	44.36	45.3	44.74	44.74	38.2	49.17	44.39	79.72	90.05	100	54.63	52.24	53.92
Piriformospora_indica	43.6	40.35	41.44	44.94	45.14	43.58	43.58	44.96	45.05	45.54	45.16	42.64	44.1	44.08	42.11	43.94	45.07	43.52	45.42	45.34	45.56	45.35	42.28	44.96	46.6	46.03	47	46.88	46.2	47.96	48.21	48.99	47.57	47.67	49.13	48.26	48.06	47.87	47.29	47.67	42.21	50.56	45.32	54.44	54.05	54.63	100	56.45	55.45
Hypsizygus_marmoreus	45.6	43.5	42.66	45.6	45.79	45.4	45.6	45.6	46.97	45.79	45.99	45.1	46.97	44.81	45.08	47.92	46.97	46.97	48.59	49.25	46.29	47.06	42.42	47.75	48.14	45.99	46.77	46.94	47.05	47.45	48.61	48.27	46.67	46.77	47.75	47.16	47.36	46.97	46.38	46.38	42.13	52.81	49.62	52.93	52.24	52.24	56.45	100	61.61
Rhizoctonia_solani	41.84	42.28	42.28	44.7	45.09	42.77	42.58	45.11	44.04	45.87	45.49	42.97	43.98	43.65	43.88	43.96	46.93	45.02	47.14	47.49	45.61	46.36	41.07	47.22	47.31	46.46	46.85	46.23	46.33	48.27	48.33	48.43	45.87	45.98	46.85	46.55	46.36	46.17	45.98	45.98	40.73	51.65	48.87	54.49	53.92	53.92	55.45	61.61	100
Thanatephorus_cucumeris	42.64	42.25	42.69	45.83	45.44	43.91	43.6	45.65	45.47	47	46.62	44.02	45.9	44.32	44.42	45.52	46.5	45.37	47.22	47.97	46.01	47.14	40.66	46.91	48	46.77	47.34	47.46	47.56	49.52	48.42	48.84	47.4	47.5	47.15	48.46	48.46	48.07	47.49	47.49	41.77	51.94	49.11	52.76	54.16	52.76	55.45	60.83	88.15
[truncated: 1 more columns]

## Sheet: GUP1_mammals
MAMMALS	Ornithorhynchus_anatinus	Cricetulus_griseus	Mus_musculus	Rattus_norvegicus	Heterocephalus_glaber	Fukomys_damarensis	Cavia_porcellus	Camelus_ferus	Tupaia_chinensis	Bos_taurus	Ovis_aries	Oryctolagus_cuniculus	Callithrix_jacchus	Papio_anubis	Chlorocebus_sabaeus	Macaca_mulatta	Homo_sapiens	Pongo_abelii	Gorilla_gorilla_gorilla	Nomascus_leucogenys	Ictidomys_tridecemlineatus	Ailuropoda_melanoleuca	Pteropus_alecto	Myotis_davidii	Otolemur_garnettii	Equus_caballus	Sus_scrofa	Mustela_putorius	Neovison_vison	Canis_lupus_familiaris	Felis_catus	Sarcophilus_harrisii	Monodelphis_domestica
Ornithorhynchus_anatinus	100	62.3	55.7	55.03	54.85	54.52	54.85	54.85	55.23	53.85	55.52	56.86	55.18	55.18	55.52	55.52	55.18	55.52	55.52	52.74	55.85	56.52	55.85	55.52	55.52	46.77	55.52	56.19	46.6	56.52	56.52	55.18	51.84
Cricetulus_griseus	62.3	100	95.19	95.95	89.87	90.61	89.85	90.1	91.37	88.83	89.09	92.13	91.39	91.12	91.88	91.62	91.37	91.88	91.88	92.83	93.4	90.59	90.61	90.1	92.39	94.94	91.62	91.12	93.93	91.62	91.62	79.9	76.08
Mus_musculus	55.7	95.19	100	97.07	87.81	88.69	88.91	89.14	90.5	88.44	88.44	91.61	91.16	90.48	90.7	90.48	90.02	91.16	90.93	91.76	91.38	90.23	89.34	89.34	90.7	92.43	90.7	89.57	90.82	90.7	90.25	78.41	74.55
Rattus_norvegicus	55.03	95.95	97.07	100	88.04	89.37	89.82	90.05	90.95	88.66	88.66	92.29	91.84	90.48	90.7	90.48	90.25	91.16	90.93	91.18	92.52	90.91	89.57	88.66	91.38	92.76	91.16	90.48	91.16	91.16	90.48	78.86	74.55
Heterocephalus_glaber	54.85	89.87	87.81	88.04	100	92.12	91.67	86.94	88.29	86.68	87.13	89.62	88.04	87.13	87.81	87.58	87.36	88.49	88.26	87.39	88.94	86.88	87.58	87.81	88.71	88.85	89.16	87.58	87.8	88.49	88.49	77.65	73.59
Fukomys_damarensis	54.52	90.61	88.69	89.37	92.12	100	92.79	88.74	89.64	88.26	88.49	90.29	89.39	89.39	89.84	89.62	89.16	90.29	90.07	90.32	90.52	88.24	89.16	88.49	90.29	91.48	90.74	89.16	90.51	90.07	89.84	78.23	73.47
Cavia_porcellus	54.85	89.85	88.91	89.82	91.67	92.79	100	89.19	91.44	89.16	89.39	93	89.62	90.07	90.74	90.52	90.07	90.74	90.52	90.32	90.97	88.24	90.07	88.94	90.74	91.15	91.65	90.52	90.51	90.74	90.97	79.14	75.51
Camelus_ferus	54.85	90.1	89.14	90.05	86.94	88.74	89.19	100	91.22	91.42	91.2	91.65	90.97	90.52	90.74	90.52	90.52	91.42	91.2	91.79	90.07	90.72	90.97	88.49	90.74	93.77	94.13	91.2	92.54	93	91.87	78.46	73.7
Tupaia_chinensis	55.23	91.37	90.5	90.95	88.29	89.64	91.44	91.22	100	91.67	91.89	93.02	92.79	93.24	93.92	93.69	93.47	94.37	94.14	93.86	92.57	91.65	93.47	90.54	93.47	95.1	93.69	93.24	94.59	93.92	93.47	79.86	75.79
Bos_taurus	53.85	88.83	88.44	88.66	86.68	88.26	89.16	91.42	91.67	100	98.2	91.67	90.99	92.12	92.34	92.12	92.12	92.79	92.57	93.86	92.12	90.52	91.67	89.64	90.77	94.44	94.37	91.22	93.24	92.57	92.79	79.19	75.57
Ovis_aries	55.52	89.09	88.44	88.66	87.13	88.49	89.39	91.2	91.89	98.2	100	91.89	90.99	92.12	92.34	92.12	91.89	92.57	92.34	93.27	92.34	90.74	91.67	89.64	91.22	94.44	94.37	91.44	93.24	92.79	93.02	80.32	76.24
Oryctolagus_cuniculus	56.86	92.13	91.61	92.29	89.62	90.29	93	91.65	93.02	91.67	91.89	100	92.34	92.79	93.02	92.79	92.57	93.24	93.02	93.57	93.69	91.65	92.57	90.32	93.24	94.44	93.92	92.57	93.58	93.69	93.47	80.54	75.11
Callithrix_jacchus	55.18	91.39	91.16	91.84	88.04	89.39	89.62	90.97	92.79	90.99	90.99	92.34	100	95.72	95.95	95.72	95.5	96.62	96.4	95.91	93.24	93.45	93.69	90.99	93.69	94.44	93.92	92.79	92.91	93.92	94.14	80.32	75.79
Papio_anubis	55.18	91.12	90.48	90.48	87.13	89.39	90.07	90.52	93.24	92.12	92.12	92.79	95.72	100	99.32	99.55	97.75	97.75	98.2	98.83	93.47	91.87	94.59	90.77	94.14	95.75	94.14	93.69	94.93	94.14	94.59	80.77	76.47
Chlorocebus_sabaeus	55.52	91.88	90.7	90.7	87.81	89.84	90.74	90.74	93.92	92.34	92.34	93.02	95.95	99.32	100	99.77	98.42	98.42	98.87	99.12	93.69	92.1	94.82	91.44	94.82	96.08	94.82	94.37	95.27	94.37	95.27	81	76.47
Macaca_mulatta	55.52	91.62	90.48	90.48	87.58	89.62	90.52	90.52	93.69	92.12	92.12	92.79	95.72	99.55	99.77	100	98.2	98.2	98.65	98.83	93.47	91.87	95.05	91.22	94.59	95.75	94.59	94.14	94.93	94.14	95.05	80.77	76.47
Homo_sapiens	55.18	91.37	90.02	90.25	87.36	89.16	90.07	90.52	93.47	92.12	91.89	92.57	95.5	97.75	98.42	98.2	100	98.42	99.1	99.12	93.24	91.65	94.37	90.99	94.37	95.42	94.37	94.14	94.59	93.92	94.82	80.09	76.02
Pongo_abelii	55.52	91.88	91.16	91.16	88.49	90.29	90.74	91.42	94.37	92.79	92.57	93.24	96.62	97.75	98.42	98.2	98.42	100	99.32	98.83	93.92	93	95.05	92.12	95.05	95.75	95.5	94.59	94.26	95.05	95.5	80.32	75.79
Gorilla_gorilla_gorilla	55.52	91.88	90.93	90.93	88.26	90.07	90.52	91.2	94.14	92.57	92.34	93.02	96.4	98.2	98.87	98.65	99.1	99.32	100	99.42	93.69	92.55	94.82	91.89	95.27	95.75	95.27	94.82	94.93	94.82	95.27	80.54	76.02
Nomascus_leucogenys	52.74	92.83	91.76	91.18	87.39	90.32	90.32	91.79	93.86	93.86	93.27	93.57	95.91	98.83	99.12	98.83	99.12	98.83	99.42	100	94.74	93.27	94.15	92.69	95.32	95.42	95.61	94.74	94.59	94.74	95.61	81.29	76.9
Ictidomys_tridecemlineatus	55.85	93.4	91.38	92.52	88.94	90.52	90.97	90.07	92.57	92.12	92.34	93.69	93.24	93.47	93.69	93.47	93.24	93.92	93.69	94.74	100	91.42	92.57	89.86	93.47	94.77	93.02	92.34	93.58	93.69	94.14	79.64	74.89
Ailuropoda_melanoleuca	56.52	90.59	90.23	90.91	86.88	88.24	88.24	90.72	91.65	90.52	90.74	91.65	93.45	91.87	92.1	91.87	91.65	93	92.55	93.27	91.42	100	91.42	89.62	91.65	93.79	93.23	93.23	94.26	94.81	94.36	79.82	75.51
Pteropus_alecto	55.85	90.61	89.34	89.57	87.58	89.16	90.07	90.97	93.47	91.67	91.67	92.57	93.69	94.59	94.82	95.05	94.37	95.05	94.82	94.15	92.57	91.42	100	92.34	92.79	95.1	94.37	93.24	92.91	93.47	94.59	80.32	76.47
Myotis_davidii	55.52	90.1	89.34	88.66	87.81	88.49	88.94	88.49	90.54	89.64	89.64	90.32	90.99	90.77	91.44	91.22	90.99	92.12	91.89	92.69	89.86	89.62	92.34	100	90.99	95.1	92.79	90.54	91.55	91.44	91.44	77.38	73.76
Otolemur_garnettii	55.52	92.39	90.7	91.38	88.71	90.29	90.74	90.74	93.47	90.77	91.22	93.24	93.69	94.14	94.82	94.59	94.37	95.05	95.27	95.32	93.47	91.65	92.79	90.99	100	95.75	94.14	93.47	94.59	93.92	93.69	80.77	75.57
Equus_caballus	46.77	94.94	92.43	92.76	88.85	91.48	91.15	93.77	95.1	94.44	94.44	94.44	94.44	95.75	96.08	95.75	95.42	95.75	95.75	95.42	94.77	93.79	95.1	95.1	95.75	100	96.73	94.44	95.61	96.08	96.08	80.72	76.8
Sus_scrofa	55.52	91.62	90.7	91.16	89.16	90.74	91.65	94.13	93.69	94.37	94.37	93.92	93.92	94.14	94.82	94.59	94.37	95.5	95.27	95.61	93.02	93.23	94.37	92.79	94.14	96.73	100	94.59	95.95	95.5	95.27	81.45	76.7
Mustela_putorius	56.19	91.12	89.57	90.48	87.58	89.16	90.52	91.2	93.24	91.22	91.44	92.57	92.79	93.69	94.37	94.14	94.14	94.59	94.82	94.74	92.34	93.23	93.24	90.54	93.47	94.44	94.59	100	98.65	95.5	95.95	80.09	75.79
Neovison_vison	46.6	93.93	90.82	91.16	87.8	90.51	90.51	92.54	94.59	93.24	93.24	93.58	92.91	94.93	95.27	94.93	94.59	94.26	94.93	94.59	93.58	94.26	92.91	91.55	94.59	95.61	95.95	98.65	100	96.28	96.28	80.74	76.35
Canis_lupus_familiaris	56.52	91.62	90.7	91.16	88.49	90.07	90.74	93	93.92	92.57	92.79	93.69	93.92	94.14	94.37	94.14	93.92	95.05	94.82	94.74	93.69	94.81	93.47	91.44	93.92	96.08	95.5	95.5	96.28	100	96.4	80.32	76.02
Felis_catus	56.52	91.62	90.25	90.48	88.49	89.84	90.97	91.87	93.47	92.79	93.02	93.47	94.14	94.59	95.27	95.05	94.82	95.5	95.27	95.61	94.14	94.36	94.59	91.44	93.69	96.08	95.27	95.95	96.28	96.4	100	81	76.24
Sarcophilus_harrisii	55.18	79.9	78.41	78.86	77.65	78.23	79.14	78.46	79.86	79.19	80.32	80.54	80.32	80.77	81	80.77	80.09	80.32	80.54	81.29	79.64	79.82	80.32	77.38	80.77	80.72	81.45	80.09	80.74	80.32	81	100	86.49
Monodelphis_domestica	51.84	76.08	74.55	74.55	73.59	73.47	75.51	73.7	75.79	75.57	76.24	75.11	75.79	76.47	76.47	76.47	76.02	75.79	76.02	76.9	74.89	75.51	76.47	73.76	75.57	76.8	76.7	75.79	76.35	76.02	76.24	86.49	100

## Sheet: GUP1_fishes
FISHES	Takifugu_rubripes	Oreochromis_niloticus	Oryzias_latipes	Dicentrarchus_labrax	Poeciliopsis_prolifica	Salmo_salar
Takifugu_rubripes	100.00	85.77	86.38	89.24	66.22	66.59
Oreochromis_niloticus	85.77	100.00	88.09	90.27	66.89	67.03
Oryzias_latipes	86.38	88.09	100.00	89.29	66.29	67.26
Dicentrarchus_labrax	89.24	90.27	89.29	100.00	69.56	69.00
Poeciliopsis_prolifica	66.22	66.89	66.29	69.56	100.00	79.33
Salmo_salar	66.59	67.03	67.26	69.00	79.33	100.00

## Sheet: GUP1_reptiles
REPTILES	Ophiophagus_hannah	Anolis_carolinensis	Alligator_mississippiensis	Pelodiscus_sinensis
Ophiophagus_hannah	100.00	80.82	77.03	78.45
Anolis_carolinensis	80.82	100.00	81.48	83.21
Alligator_mississippiensis	77.03	81.48	100.00	85.55
Pelodiscus_sinensis	78.45	83.21	85.55	100.00

## Sheet: GUP1_birds
BIRDS	Struthio_camelus_australis	Tinamus_guttatus	Corvus_brachyrhynchos	Ficedula_albicollis	Taeniopygia_guttata	Manacus_vitellinus	Merops_nubicus	Amazona_aestiva	Nestor_notabilis	Gallus_gallus	Picoides_pubescens	Acanthisitta_chloris	Colius_striatus	Eurypyga_helias	Cuculus_canorus	Pterocles_gutturalis	Buceros_rhinoceros_silvestris	Anas_platyrhynchos	Haliaeetus_albicilla	Fulmarus_glacialis	Opisthocomus_hoazin	Antrostomus_carolinensis	Cariama_cristata	Tauraco_erythrolophus	Pelecanus_crispus	Nipponia_nippon	Podiceps_cristatus	Charadrius_vociferus	Chlamydotis_macqueenii	Tyto_alba	Egretta_garzetta	Phalacrocorax_carbo	Cathartes_aura	Aptenodytes_forsteri	Pygoscelis_adeliae
Struthio_camelus_australis	100	93.68	87.58	86.43	87.53	86.88	86.26	87.07	88.66	89.34	87.53	87.1	88.15	91	88.53	90.7	90.05	90.7	91.14	91.16	90.7	91.47	90.93	89.94	91.84	90.7	90.93	90.48	91.84	92.61	92.06	91.61	91.61	91.61	91.38
Tinamus_guttatus	93.68	100	86.91	85.29	86.39	85.97	87.2	87.3	89.12	89.8	86.85	86.88	89.1	91.94	87.61	89.8	90.52	90.7	90.23	90.48	90.25	90.52	90.48	88.83	90.93	90.48	90.48	90.48	90.7	91.87	91.16	91.61	91.38	91.38	90.93
Corvus_brachyrhynchos	87.58	86.91	100	92.34	96.16	93.02	88.26	89.39	90.29	88.04	90.07	92.57	90.61	89.67	87.9	90.07	90.14	91.2	90.72	90.97	91.42	92.49	90.52	91.06	90.97	91.2	92.1	90.97	90.74	91.67	91.42	92.78	92.1	92.78	92.1
Ficedula_albicollis	86.43	85.29	92.34	100	95.49	93.24	87.32	87.13	87.81	86	87.81	91.44	89.67	87.32	85.39	88.71	87.79	88.49	88.46	88.26	88.94	89.2	88.04	88.83	88.26	88.26	89.16	88.71	88.94	88.48	88.94	90.07	89.39	89.62	88.94
Taeniopygia_guttata	87.53	86.39	96.16	95.49	100	95.71	88.26	89.14	89.59	88.01	90.27	93.91	90.61	89.2	88.33	90.27	89.67	91.4	91.16	90.95	91.4	91.55	90.72	91.6	90.95	91.18	92.31	91.4	91.4	91.65	91.86	92.76	92.31	92.53	91.86
Manacus_vitellinus	86.88	85.97	93.02	93.24	95.71	100	89.2	88.71	89.16	87.81	90.97	93.47	90.61	87.79	87.67	90.52	89.2	90.52	90.95	90.52	91.2	89.67	90.74	91.62	90.52	90.97	91.87	91.2	90.97	91.42	91.42	92.78	91.87	92.1	91.65
Merops_nubicus	86.26	87.2	88.26	87.32	88.26	89.2	100	90.14	89.2	88.26	89.67	87.32	90.61	90.61	85.58	90.61	92.02	91.55	91.08	89.67	91.08	89.67	90.61	91.41	91.08	91.08	91.55	91.55	91.08	92.49	92.02	92.02	92.02	92.49	91.55
Amazona_aestiva	87.07	87.3	89.39	87.13	89.14	88.71	90.14	100	96.16	89.62	88.71	90.52	89.67	91.08	89.5	90.52	91.55	92.55	92.76	91.42	92.33	91.55	91.87	92.46	92.1	93.68	92.55	93.23	92.78	92.65	93.23	92.55	93.23	93.23	92.55
Nestor_notabilis	88.66	89.12	90.29	87.81	89.59	89.16	89.2	96.16	100	89.84	89.62	90.52	89.67	91.55	90.41	91.42	92.49	93.23	93.67	92.55	93.23	92.02	92.55	92.74	93.45	94.58	93.45	93.68	93.68	93.63	93.23	93	93.68	93.68	93.45
Gallus_gallus	89.34	89.8	88.04	86	88.01	87.81	88.26	89.62	89.84	100	87.58	89.16	89.67	92.96	89.73	90.97	91.08	92.33	92.76	92.55	91.87	92.02	92.55	91.62	92.55	93	92.55	92.1	93.23	93.63	93.23	92.78	93.23	93.23	93
Picoides_pubescens	87.53	86.85	90.07	87.81	90.27	90.97	89.67	88.71	89.62	87.58	100	91.2	91.08	88.73	89.27	89.84	90.14	90.52	91.86	90.97	91.2	89.67	90.74	92.18	91.42	91.2	92.33	91.87	92.33	91.91	92.33	92.55	91.87	92.1	91.65
Acanthisitta_chloris	87.1	86.88	92.57	91.44	93.91	93.47	87.32	90.52	90.52	89.16	91.2	100	90.61	88.26	90.18	90.97	89.2	92.33	92.08	91.42	91.65	90.14	91.87	91.62	91.87	91.87	92.78	92.55	92.1	92.16	92.55	93	93	93.23	92.55
Colius_striatus	88.15	89.1	90.61	89.67	90.61	90.61	90.61	89.67	89.67	89.67	91.08	90.61	100	92.49	87.98	91.55	90.61	92.49	92.49	92.49	92.49	92.02	92.49	94.53	92.96	92.96	94.37	93.43	92.96	93.9	92.96	95.31	93.9	94.37	93.9
Eurypyga_helias	91	91.94	89.67	87.32	89.2	87.79	90.61	91.08	91.55	92.96	88.73	88.26	92.49	100	90.38	93.9	93.9	93.9	96.24	94.84	95.77	93.9	94.37	99.22	96.71	95.77	96.24	96.24	95.31	95.31	94.37	95.77	96.71	97.18	96.24
Cuculus_canorus	88.53	87.61	87.9	85.39	88.33	87.67	85.58	89.5	90.41	89.73	89.27	90.18	87.98	90.38	100	91.32	89.42	92.01	94.05	92.69	91.78	90.87	92.92	92.63	93.38	94.06	94.06	93.38	93.61	94.04	93.84	93.61	94.06	94.06	93.84
Pterocles_gutturalis	90.7	89.8	90.07	88.71	90.27	90.52	90.61	90.52	91.42	90.97	89.84	90.97	91.55	93.9	91.32	100	92.96	93.45	95.02	94.13	93.68	94.37	95.26	94.13	94.58	94.58	94.81	94.81	94.81	95.59	94.81	95.03	95.71	95.71	95.26
Buceros_rhinoceros_silvestris	90.05	90.52	90.14	87.79	89.67	89.2	92.02	91.55	92.49	91.08	90.14	89.2	90.61	93.9	89.42	92.96	100	95.31	95.31	92.96	94.37	93.9	93.43	95.31	94.84	94.84	95.31	94.84	94.37	94.37	92.96	94.37	95.31	95.77	95.31
Anas_platyrhynchos	90.7	90.7	91.2	88.49	91.4	90.52	91.55	92.55	93.23	92.33	90.52	92.33	92.49	93.9	92.01	93.45	95.31	100	94.8	94.13	94.81	94.37	94.81	93.85	94.58	95.03	95.49	94.58	95.26	96.08	95.03	95.94	95.94	95.94	95.49
Haliaeetus_albicilla	91.14	90.23	90.72	88.46	91.16	90.95	91.08	92.76	93.67	92.76	91.86	92.08	92.49	96.24	94.05	95.02	95.31	94.8	100	95.7	95.25	95.31	95.93	95.8	96.38	96.61	96.83	96.38	97.06	96.81	96.83	96.38	97.06	97.06	96.83
Fulmarus_glacialis	91.16	90.48	90.97	88.26	90.95	90.52	89.67	91.42	92.55	92.55	90.97	91.42	92.49	94.84	92.69	94.13	92.96	94.13	95.7	100	94.58	93.9	95.49	95.53	96.61	96.39	96.84	96.16	96.39	96.81	97.07	96.61	96.84	97.29	97.07
Opisthocomus_hoazin	90.7	90.25	91.42	88.94	91.4	91.2	91.08	92.33	93.23	91.87	91.2	91.65	92.49	95.77	91.78	93.68	94.37	94.81	95.25	94.58	100	94.37	95.49	94.41	95.71	95.94	96.16	95.71	95.71	96.32	95.94	96.61	96.84	96.84	96.16
Antrostomus_carolinensis	91.47	90.52	92.49	89.2	91.55	89.67	89.67	91.55	92.02	92.02	89.67	90.14	92.02	93.9	90.87	94.37	93.9	94.37	95.31	93.9	94.37	100	94.37	96.09	95.77	95.77	97.18	95.77	94.37	95.31	93.43	95.77	95.77	96.24	96.24
Cariama_cristata	90.93	90.48	90.52	88.04	90.72	90.74	90.61	91.87	92.55	92.55	90.74	91.87	92.49	94.37	92.92	95.26	93.43	94.81	95.93	95.49	95.49	94.37	100	94.97	96.84	96.16	96.39	95.94	96.84	97.3	96.16	96.84	97.07	97.07	96.84
Tauraco_erythrolophus	89.94	88.83	91.06	88.83	91.6	91.62	91.41	92.46	92.74	91.62	92.18	91.62	94.53	99.22	92.63	94.13	95.31	93.85	95.8	95.53	94.41	96.09	94.97	100	95.53	95.81	97.49	96.37	96.09	95.67	96.93	96.09	96.37	96.65	95.81
Pelecanus_crispus	91.84	90.93	90.97	88.26	90.95	90.52	91.08	92.1	93.45	92.55	91.42	91.87	92.96	96.71	93.38	94.58	94.84	94.58	96.38	96.61	95.71	95.77	96.84	95.53	100	97.07	97.74	96.39	97.07	97.3	96.84	96.84	97.52	97.52	97.29
Nipponia_nippon	90.7	90.48	91.2	88.26	91.18	90.97	91.08	93.68	94.58	93	91.2	91.87	92.96	95.77	94.06	94.58	94.84	95.03	96.61	96.39	95.94	95.77	96.16	95.81	97.07	100	97.52	97.07	96.84	97.79	97.07	97.07	97.74	97.74	97.52
Podiceps_cristatus	90.93	90.48	92.1	89.16	92.31	91.87	91.55	92.55	93.45	92.55	92.33	92.78	94.37	96.24	94.06	94.81	95.31	95.49	96.83	96.84	96.16	97.18	96.39	97.49	97.74	97.52	100	96.84	97.07	97.79	97.29	97.97	97.97	97.97	97.74
Charadrius_vociferus	90.48	90.48	90.97	88.71	91.4	91.2	91.55	93.23	93.68	92.1	91.87	92.55	93.43	96.24	93.38	94.81	94.84	94.58	96.38	96.16	95.71	95.77	95.94	96.37	96.39	97.07	96.84	100	96.61	96.81	96.84	96.84	97.52	97.97	97.29
Chlamydotis_macqueenii	91.84	90.7	90.74	88.94	91.4	90.97	91.08	92.78	93.68	93.23	92.33	92.1	92.96	95.31	93.61	94.81	94.37	95.26	97.06	96.39	95.71	94.37	96.84	96.09	97.07	96.84	97.07	96.61	100	97.3	97.29	96.84	97.29	97.29	97.07
Tyto_alba	92.61	91.87	91.67	88.48	91.65	91.42	92.49	92.65	93.63	93.63	91.91	92.16	93.9	95.31	94.04	95.59	94.37	96.08	96.81	96.81	96.32	95.31	97.3	95.67	97.3	97.79	97.79	96.81	97.3	100	97.79	97.79	98.04	98.28	98.04
Egretta_garzetta	92.06	91.16	91.42	88.94	91.86	91.42	92.02	93.23	93.23	93.23	92.33	92.55	92.96	94.37	93.84	94.81	92.96	95.03	96.83	97.07	95.94	93.43	96.16	96.93	96.84	97.07	97.29	96.84	97.29	97.79	100	97.29	97.97	97.97	97.29
Phalacrocorax_carbo	91.61	91.61	92.78	90.07	92.76	92.78	92.02	92.55	93	92.78	92.55	93	95.31	95.77	93.61	95.03	94.37	95.94	96.38	96.61	96.61	95.77	96.84	96.09	96.84	97.07	97.97	96.84	96.84	97.79	97.29	100	98.42	98.42	97.74
Cathartes_aura	91.61	91.38	92.1	89.39	92.31	91.87	92.02	93.23	93.68	93.23	91.87	93	93.9	96.71	94.06	95.71	95.31	95.94	97.06	96.84	96.84	95.77	97.07	96.37	97.52	97.74	97.97	97.52	97.29	98.04	97.97	98.42	100	99.1	98.42
Aptenodytes_forsteri	91.61	91.38	92.78	89.62	92.53	92.1	92.49	93.23	93.68	93.23	92.1	93.23	94.37	97.18	94.06	95.71	95.77	95.94	97.06	97.29	96.84	96.24	97.07	96.65	97.52	97.74	97.97	97.97	97.29	98.28	97.97	98.42	99.1	100	99.32
Pygoscelis_adeliae	91.38	90.93	92.1	88.94	91.86	91.65	91.55	92.55	93.45	93	91.65	92.55	93.9	96.24	93.84	95.26	95.31	95.49	96.83	97.07	96.16	96.24	96.84	95.81	97.29	97.52	97.74	97.29	97.07	98.04	97.29	97.74	98.42	99.32	100

## Sheet: GUP1_amphibia
AMPHIBIA	Xenopus_laevis	Xenopus_tropicalis
Xenopus_laevis	100.00	88.94
Xenopus_tropicalis	88.94	100.00

## Sheet: GUP1_testudines
TESTUDINES	Chelonia_mydas	Pelodiscus_sinensis
Chelonia_mydas	100.00	93.00
Pelodiscus_sinensis	93.00	100.00

## Sheet: GUP1_arthropods
ARTHROPODS	Sarcoptes_scabiei	Stegodyphus_mimosarum
Sarcoptes_scabiei	100.00	38.86
Stegodyphus_mimosarum	38.86	100.00

## Sheet: GUP1_teleostomes
TELEOSTOMES	Latimeria_chalumnae	Scleropages_formosus
Latimeria_chalumnae	100.00	73.88
Scleropages_formosus	73.88	100.00

[truncated: 8 more sheets: GUP1_"others", GUP2_yeasts, GUP2_mammals, GUP2_fishes, GUP2_birds, GUP2_nematodes, GUP2_arthropods, GUP2_"others"]
